# Supplementary material for: Predictive models for stage and risk classification in head and neck squamous cell carcinoma (HNSCC)
Source: PeerJ. 2020 Sep 22;8:e9656. doi: 10.7717/peerj.9656 (PMC7518185; doi:10.7717/peerj.9656)
Supplement: Table S1 — NA—Not available [file peerj-08-9656-s001.xlsx]

## Sheet: S Table 16
S Table - : 17 The details of clinical information of Head and Neck Squamous Cell Carcinoma. NA Not Available.
Variable	Case, n(%)
Age at diagnosis
> 60	260 (49.3 %)
<60	267 (50.7 %)
Gender
Female	142 (26.9 %)
Male	385 (73.01 %)
Metastasis
M0	191 (36.1 %)
M1	1 (0.18 %)
NA	336 (63.6 %)
Lymph node status
N0	180 (34 %)
N1-N2-N3	248 (45.9 %)
NA	100 (18.9 %)
Stage
Stage I + II	101 (19.1 %)
Stage III + IV	352 (66.66 %)
NA	76 (14.39 %)
T Stage
T1+ T2	190 (35.9 %)
T3 + T4	276 (52.2 %)
NA	62 (11.74 %)
