# Supplementary material for: Predictive models for stage and risk classification in head and neck squamous cell carcinoma (HNSCC)
Source: PeerJ. 2020 Sep 22;8:e9656. doi: 10.7717/peerj.9656 (PMC7518185; doi:10.7717/peerj.9656)
Supplement: Table S2 — The list of differentially expressed in of early-stage (|log2 ≥ 1| p-value < 0.05) in samples (N = 101) and normal sample = 44 and late-stage (N = 352). The total differentially expressed miRNAs are normal vs early N = 171 & late N = 174) [file peerj-08-9656-s002.xlsx]

## Sheet: Supl.Table 2
S Table - 2 (A) : List of differentially expressed miRNAs(|log2>1|p-value <0.05) in samples of early stage (N=101) and normal sample = 44.								S Table – 2 (B): List of differentially expressed miRNAs (|log2>1|pvalue <0.05) in samples of late stage (N=352).
miRNAs	log2FC	P.Value	adj.P.Val					miRNAs	logFC	P.Value	adj.P.Val
hsa-let-7c	-2.10941	2.51535e-19	7.67183e-18					hsa-mir-21	1.60842	4.35536e-50	2.39109e-47
hsa-mir-1-2	-2.7921	2.26948e-05	6.16804e-05					hsa-mir-615	3.77238	2.83128e-42	7.77185e-40
hsa-mir-100	-1.7194	7.02827e-17	1.24468e-15					hsa-mir-101-1	-1.97064	3.98209e-40	6.7384e-38
hsa-mir-101-1	-1.84555	6.42802e-29	1.17633e-26					hsa-mir-196b	3.85484	4.90958e-40	6.7384e-38
hsa-mir-101-2	-1.45753	1.74407e-20	6.83925e-19					hsa-mir-455	2.4682	3.1646e-37	3.47474e-35
hsa-mir-105-1	2.45135	4.70929e-05	0.000116986					hsa-mir-503	2.92183	1.68754e-36	1.5441e-34
hsa-mir-105-2	2.21889	0.000224359	0.000484934					hsa-mir-1301	1.80251	4.30845e-33	3.37906e-31
hsa-mir-1237	1.03976	2.60824e-07	9.12054e-07					hsa-mir-139	-1.82173	2.65197e-32	1.81992e-30
hsa-mir-1245	1.14987	7.75434e-06	2.27654e-05					hsa-mir-196a-1	4.29374	8.69799e-31	5.30577e-29
hsa-mir-1247	-1.35394	9.85861e-06	2.80434e-05					hsa-mir-210	3.21766	3.74911e-30	2.05826e-28
hsa-mir-1254	1.56889	9.50189e-11	6.28499e-10					hsa-mir-30a	-1.92225	2.67333e-29	1.33424e-27
hsa-mir-1258	-2.2581	2.25973e-15	3.26472e-14					hsa-mir-29c	-2.24927	4.58875e-28	2.09935e-26
hsa-mir-125b-2	-1.81094	1.153e-13	1.09137e-12					hsa-mir-375	-4.24699	1.26033e-27	5.32247e-26
hsa-mir-1269	2.39618	0.000109138	0.000248616					hsa-mir-195	-1.74534	2.24321e-27	8.7966e-26
hsa-mir-127	-1.12263	5.7399e-09	2.69334e-08					hsa-mir-130b	1.49239	3.13818e-26	1.14857e-24
hsa-mir-1292	1.23751	7.24548e-08	2.84126e-07					hsa-mir-1910	2.88919	3.80908e-26	1.30699e-24
hsa-mir-1293	3.11113	1.08242e-14	1.26436e-13					hsa-mir-101-2	-1.47693	4.92497e-25	1.59048e-23
hsa-mir-1301	1.87027	1.6335e-27	1.49465e-25					hsa-mir-301a	2.26001	6.89327e-25	2.10245e-23
hsa-mir-1305	2.13935	9.891e-15	1.2067e-13					hsa-mir-140	-1.07114	1.30527e-24	3.77156e-23
hsa-mir-1306	1.2464	7.82477e-18	1.71832e-16					hsa-mir-100	-1.86148	2.16967e-24	5.95573e-23
hsa-mir-1307	1.28666	4.35908e-18	9.97139e-17					hsa-mir-29a	-1.36233	2.33031e-24	6.0921e-23
hsa-mir-130b	1.38671	3.30929e-19	9.56212e-18					hsa-mir-196a-2	3.67662	3.07957e-24	7.68493e-23
hsa-mir-133a-1	-2.10156	0.00136855	0.0024394					hsa-mir-26a-2	-1.18923	4.2295e-24	1.00956e-22
hsa-mir-133a-2	-2.00632	0.00159291	0.00275002					hsa-mir-30e	-1.00558	5.1858e-24	1.18625e-22
hsa-mir-133b	-2.22254	0.000720316	0.00140232					hsa-mir-99a	-2.40664	5.41102e-24	1.18826e-22
hsa-mir-135a-1	-2.83568	1.31591e-16	2.25761e-15					hsa-let-7c	-2.16619	6.74449e-24	1.42412e-22
hsa-mir-135b	1.55199	8.78128e-11	5.87917e-10					hsa-mir-877	1.95206	1.22269e-22	2.48614e-21
hsa-mir-136	-1.33222	5.0077e-10	2.89392e-09					hsa-mir-454	1.51842	1.60952e-22	3.1558e-21
hsa-mir-139	-1.46248	2.53226e-18	6.31913e-17					hsa-mir-193b	1.71135	2.47366e-22	4.6829e-21
hsa-mir-142	1.22527	5.27687e-08	2.13015e-07					hsa-mir-381	-2.18414	3.87672e-22	7.0944e-21
hsa-mir-143	-1.32257	2.12452e-09	1.09006e-08					hsa-mir-1258	-2.41845	4.02297e-22	7.12455e-21
hsa-mir-147b	1.28216	3.30517e-06	1.03056e-05					hsa-mir-550a-1	1.50331	4.58961e-22	7.87406e-21
hsa-mir-1537	1.25531	6.26096e-08	2.49077e-07					hsa-mir-378c	-1.87241	6.15077e-22	1.02327e-20
hsa-mir-16-2	1.16651	1.97851e-12	1.59735e-11					hsa-mir-450a-2	1.78697	1.19135e-21	1.92368e-20
hsa-mir-181b-1	1.00365	1.19058e-14	1.30726e-13					hsa-mir-1307	1.36889	2.36073e-21	3.70297e-20
hsa-mir-181b-2	1.66949	1.34207e-10	8.56742e-10					hsa-mir-135a-1	-2.65233	3.99765e-21	5.93165e-20
hsa-mir-182	1.01036	3.50792e-08	1.45898e-07					hsa-mir-301b	2.38424	1.55849e-20	2.25161e-19
hsa-mir-183	1.26715	4.03242e-12	3.20841e-11					hsa-mir-2355	1.54178	3.34434e-20	4.70781e-19
hsa-mir-187	1.3026	0.000558577	0.00111512					hsa-mir-93	1.53038	4.15403e-20	5.70141e-19
hsa-mir-18a	1.73992	5.48766e-17	1.03887e-15					hsa-mir-18a	1.65203	1.61669e-19	2.16478e-18
hsa-mir-1910	2.86694	3.71019e-23	2.26322e-21					hsa-mir-1293	2.90949	3.21361e-19	4.20065e-18
hsa-mir-193b	1.71726	5.19252e-17	1.0181e-15					hsa-mir-671	1.08921	5.1824e-19	6.61659e-18
hsa-mir-195	-1.64281	1.71771e-20	6.83925e-19					hsa-mir-708	1.43356	5.97463e-19	7.45471e-18
hsa-mir-196a-1	4.15391	4.90205e-23	2.69122e-21					hsa-mir-204	-3.28498	7.08649e-19	8.64552e-18
hsa-mir-196a-2	3.49176	3.7203e-22	1.85677e-20					hsa-mir-424	1.54642	1.02923e-18	1.22837e-17
hsa-mir-196b	3.55902	1.3481e-29	3.70054e-27					hsa-mir-450a-1	1.64749	1.2424e-18	1.45122e-17
hsa-mir-19a	1.24302	2.92153e-08	1.23618e-07					hsa-mir-378	-1.59333	2.07032e-18	2.36792e-17
hsa-mir-202	-1.26808	4.11039e-06	1.26067e-05					hsa-mir-411	-1.93403	4.98365e-18	5.52394e-17
hsa-mir-204	-3.18635	5.30588e-20	1.82058e-18					hsa-mir-224	1.8841	5.03091e-18	5.52394e-17
hsa-mir-205	1.52533	6.99696e-12	5.327e-11					hsa-mir-324	1.18426	8.14743e-18	8.77046e-17
hsa-mir-208b	-1.63032	0.000429743	0.00087706					hsa-mir-3922	1.64354	5.29751e-17	5.59294e-16
hsa-mir-20a	1.04258	2.30983e-07	8.12882e-07					hsa-mir-3928	1.5768	1.26758e-16	1.31302e-15
hsa-mir-21	1.61502	2.91499e-28	3.20065e-26					hsa-mir-937	2.04546	4.26738e-16	4.3385e-15
hsa-mir-210	3.03376	2.861e-18	6.82907e-17					hsa-mir-410	-1.90216	4.8251e-16	4.81633e-15
hsa-mir-216a	-1.35708	1.77953e-07	6.34392e-07					hsa-mir-379	-1.64124	6.99168e-16	6.85434e-15
hsa-mir-217	-1.03608	3.7195e-05	9.55199e-05					hsa-mir-550a-2	1.34057	1.18796e-15	1.14419e-14
hsa-mir-218-2	-1.36981	1.21736e-11	8.79381e-11					hsa-mir-486	-1.83158	2.05764e-15	1.94766e-14
hsa-mir-224	1.91573	9.74363e-16	1.57331e-14					hsa-mir-125b-2	-1.92148	4.47681e-15	4.16571e-14
hsa-mir-2277	1.15555	5.98788e-07	2.05459e-06					hsa-mir-450b	1.25697	4.93118e-15	4.51203e-14
hsa-mir-2355	1.59577	9.91513e-18	2.09362e-16					hsa-mir-1306	1.10863	5.36301e-15	4.82671e-14
hsa-mir-26a-2	-1.00204	3.23343e-14	3.28733e-13					hsa-mir-205	1.50237	8.31985e-15	7.3671e-14
hsa-mir-299	-1.55335	5.84479e-09	2.71931e-08					hsa-mir-3934	1.1608	1.551e-14	1.33047e-13
hsa-mir-29a	-1.05721	1.44897e-12	1.18729e-11					hsa-mir-183	1.46699	1.53572e-14	1.33047e-13
hsa-mir-29c	-1.84379	2.8518e-15	4.01445e-14					hsa-mir-16-2	1.15744	2.01367e-14	1.70077e-13
hsa-mir-301a	2.02293	2.01837e-18	5.27659e-17					hsa-mir-885	-2.05233	4.23587e-14	3.52347e-13
hsa-mir-301b	2.07518	7.92679e-15	9.89047e-14					hsa-mir-499	-2.49882	4.37235e-14	3.58272e-13
hsa-mir-3074	1.0994	1.10683e-09	6.07647e-09					hsa-mir-181b-2	1.66312	5.94964e-14	4.73384e-13
hsa-mir-30a	-1.95815	1.08976e-19	3.51927e-18					hsa-mir-1254	1.6891	8.43545e-14	6.6158e-13
hsa-mir-31	2.72226	9.06197e-12	6.72301e-11					hsa-mir-299	-1.61202	1.2138e-13	9.38557e-13
hsa-mir-3129	1.46511	7.64838e-10	4.24137e-09					hsa-mir-96	1.43301	1.35151e-13	1.03053e-12
hsa-mir-3136	1.27604	2.31391e-08	1.00026e-07					hsa-mir-3648	1.97449	2.17442e-13	1.61318e-12
hsa-mir-3144	1.05893	2.68937e-05	7.16729e-05					hsa-mir-944	1.47009	1.00739e-12	7.09044e-12
hsa-mir-3170	1.45795	3.71664e-10	2.18577e-09					hsa-mir-320b-2	1.22601	1.02853e-12	7.10391e-12
hsa-mir-320b-2	1.11488	1.53222e-09	8.149e-09					hsa-mir-19a	1.34283	1.03518e-12	7.10391e-12
hsa-mir-323b	1.43661	6.11133e-09	2.79594e-08					hsa-mir-383	-1.84659	1.35876e-12	9.02965e-12
hsa-mir-324	1.06434	6.83278e-15	9.14926e-14					hsa-mir-376c	-1.49662	2.01615e-12	1.3177e-11
hsa-mir-337	-1.53176	5.67925e-10	3.24782e-09					hsa-mir-135b	1.49562	2.32087e-12	1.49901e-11
hsa-mir-342	1.11594	3.84582e-09	1.88514e-08					hsa-mir-125b-1	-1.03729	3.11645e-12	1.94424e-11
hsa-mir-34b	1.0167	0.00148799	0.00260162					hsa-mir-136	-1.303	3.79139e-12	2.33873e-11
hsa-mir-3610	1.02521	3.23113e-05	8.50645e-05					hsa-mir-654	-1.57551	5.39458e-12	3.2907e-11
hsa-mir-3614	1.1526	1.68913e-08	7.3598e-08					hsa-mir-143	-1.35958	5.46957e-12	3.29977e-11
hsa-mir-3619	1.50778	3.47912e-10	2.07613e-09					hsa-mir-548f-1	2.14705	9.28857e-12	5.48325e-11
hsa-mir-3648	2.28708	5.32643e-13	4.58431e-12					hsa-mir-561	-1.47625	1.72111e-11	9.94618e-11
hsa-mir-3651	1.72833	8.68263e-08	3.34739e-07					hsa-mir-3651	1.82455	1.79227e-11	1.02496e-10
hsa-mir-3652	1.45301	4.7564e-08	1.9487e-07					hsa-mir-1305	1.82529	1.88533e-11	1.06706e-10
hsa-mir-3662	1.83665	2.08352e-10	1.31477e-09					hsa-mir-31	2.57998	2.15483e-11	1.20715e-10
hsa-mir-3677	1.27179	7.07572e-11	4.79577e-10					hsa-mir-7-3	1.53157	3.35992e-11	1.84459e-10
hsa-mir-3687	1.4359	9.21481e-06	2.64866e-05					hsa-mir-3170	1.53596	3.87084e-11	2.10405e-10
hsa-mir-369	-1.20085	4.16241e-09	1.9871e-08					hsa-mir-3662	1.80136	4.56358e-11	2.45628e-10
hsa-mir-3690	1.48644	1.64576e-07	5.94421e-07					hsa-mir-127	-1.24689	5.09964e-11	2.71816e-10
hsa-mir-375	-4.13006	1.69815e-18	4.66141e-17					hsa-mir-190	-1.04318	5.40256e-11	2.85193e-10
hsa-mir-376a-1	-1.23168	1.19886e-05	3.32411e-05					hsa-mir-1245	1.4004	6.61354e-11	3.45794e-10
hsa-mir-376c	-1.45101	1.54371e-09	8.149e-09					hsa-mir-369	-1.23267	7.72258e-11	3.99971e-10
hsa-mir-377	-1.21123	4.99248e-08	2.03028e-07					hsa-mir-1468	-1.13946	1.00469e-10	5.10717e-10
hsa-mir-378	-1.51924	8.85838e-13	7.36856e-12					hsa-mir-92a-1	1.05695	1.11234e-10	5.60253e-10
hsa-mir-378c	-1.68961	8.24101e-13	6.96049e-12					hsa-mir-940	1.17914	1.12735e-10	5.62649e-10
hsa-mir-379	-1.55661	3.50767e-13	3.1569e-12					hsa-mir-1-2	-3.67764	1.48555e-10	7.34743e-10
hsa-mir-381	-2.06495	1.89766e-14	1.96569e-13					hsa-mir-337	-1.46377	1.53392e-10	7.51896e-10
hsa-mir-383	-1.93228	3.39059e-11	2.38645e-10					hsa-mir-3652	1.43843	2.05786e-10	9.99791e-10
hsa-mir-3911	1.0835	7.46462e-07	2.51416e-06					hsa-mir-2277	1.30606	2.07868e-10	1.00105e-09
hsa-mir-3917	1.02855	5.64611e-06	1.70314e-05					hsa-mir-20a	1.09928	2.38187e-10	1.13708e-09
hsa-mir-3922	1.71206	4.6929e-13	4.15549e-12					hsa-mir-495	-1.32489	2.59191e-10	1.22669e-09
hsa-mir-3926-1	-1.21203	9.64728e-08	3.67803e-07					hsa-mir-592	1.60622	2.68406e-10	1.25944e-09
hsa-mir-3928	1.61821	8.08218e-14	7.78441e-13					hsa-mir-1292	1.25471	2.85334e-10	1.32753e-09
hsa-mir-3934	1.26068	3.41382e-14	3.40761e-13					hsa-mir-3619	1.3471	3.34871e-10	1.54491e-09
hsa-mir-3940	1.5103	2.48485e-10	1.51576e-09					hsa-mir-377	-1.3298	4.38104e-10	1.98776e-09
hsa-mir-410	-1.84105	7.12912e-15	9.31877e-14					hsa-mir-545	1.20166	4.87467e-10	2.1936e-09
hsa-mir-411	-1.93939	1.25704e-14	1.35316e-13					hsa-mir-616	1.25048	5.70779e-10	2.52708e-09
hsa-mir-421	1.04568	1.10037e-10	7.19173e-10					hsa-mir-7-2	1.38714	7.04945e-10	3.09612e-09
hsa-mir-424	1.60323	3.47376e-16	5.77908e-15					hsa-mir-217	-1.41816	7.74864e-10	3.37619e-09
hsa-mir-425	1.0011	5.37843e-08	2.1553e-07					hsa-mir-216a	-1.42739	9.64947e-10	4.13872e-09
hsa-mir-432	-1.14585	1.24382e-07	4.5524e-07					hsa-mir-3074	1.13041	9.74192e-10	4.14598e-09
hsa-mir-4326	1.8099	3.07498e-06	9.64666e-06					hsa-mir-487b	-1.19694	1.07999e-09	4.56089e-09
hsa-mir-433	-1.17433	6.93612e-06	2.05834e-05					hsa-mir-182	1.14621	1.27448e-09	5.34116e-09
hsa-mir-450a-1	1.63668	1.51227e-14	1.5966e-13					hsa-mir-3926-1	-1.25884	1.51882e-09	6.3169e-09
hsa-mir-450a-2	1.73426	2.0234e-15	3.00229e-14					hsa-mir-1277	1.39917	1.53196e-09	6.32364e-09
hsa-mir-450b	1.22338	2.10221e-13	1.92352e-12					hsa-mir-573	1.55392	2.36016e-09	9.59799e-09
hsa-mir-454	1.37132	7.31965e-15	9.34532e-14					hsa-mir-676	-1.27762	2.59136e-09	1.03843e-08
hsa-mir-455	2.38319	2.63304e-27	2.06506e-25					hsa-mir-3622a	-1.07709	2.82355e-09	1.12328e-08
hsa-mir-484	1.02843	1.31673e-13	1.22523e-12					hsa-mir-939	1.02938	4.40518e-09	1.73989e-08
hsa-mir-486	-1.37001	5.42449e-07	1.87298e-06					hsa-mir-1274b	-1.52835	6.29273e-09	2.44732e-08
hsa-mir-487b	-1.15643	2.77131e-08	1.18863e-07					hsa-mir-3940	1.27535	6.33004e-09	2.44732e-08
hsa-mir-495	-1.40354	4.7494e-09	2.24778e-08					hsa-mir-202	-1.29396	6.99847e-09	2.66817e-08
hsa-mir-499	-2.27413	1.70509e-07	6.11826e-07					hsa-mir-636	1.17882	7.26006e-09	2.74881e-08
hsa-mir-503	3.06823	1.20211e-28	1.6499e-26					hsa-mir-208b	-2.10022	1.24033e-08	4.63224e-08
hsa-mir-504	-1.06789	0.00016053	0.000358257					hsa-mir-548b	-1.3134	1.48523e-08	5.5094e-08
hsa-mir-508	-1.49995	0.000171881	0.000378966					hsa-mir-3691	1.10463	1.59472e-08	5.87586e-08
hsa-mir-512-1	1.04212	0.000338086	0.000713881					hsa-mir-432	-1.29005	1.6311e-08	5.96983e-08
hsa-mir-512-2	1.17232	4.17891e-05	0.000104759					hsa-mir-133b	-3.40897	2.4774e-08	9.00722e-08
hsa-mir-514-1	-1.36465	0.000545406	0.0010928					hsa-mir-1247	-1.8061	3.63566e-08	1.30456e-07
hsa-mir-514-2	-1.25687	0.00151998	0.00264911					hsa-mir-133a-1	-3.14413	3.89742e-08	1.37159e-07
hsa-mir-514-3	-1.33265	0.0010963	0.00201312					hsa-mir-133a-2	-3.094	5.87181e-08	2.05326e-07
hsa-mir-519a-1	1.53451	7.24129e-05	0.000171356					hsa-mir-642a	1.1958	8.33566e-08	2.79041e-07
hsa-mir-520f	1.13625	4.884e-05	0.000120238					hsa-mir-105-1	3.23106	1.02191e-07	3.40016e-07
hsa-mir-545	1.1079	1.70373e-06	5.50204e-06					hsa-mir-548k	1.28736	1.06669e-07	3.50666e-07
hsa-mir-548f-1	1.82698	6.36029e-09	2.88578e-08					hsa-mir-4326	1.84803	1.13505e-07	3.7092e-07
hsa-mir-548k	1.04092	8.08509e-06	2.34853e-05					hsa-mir-3129	1.13005	1.76239e-07	5.72515e-07
hsa-mir-550a-1	1.5988	3.59868e-20	1.31712e-18					hsa-mir-142	1.05005	2.32668e-07	7.42645e-07
hsa-mir-550a-2	1.41821	1.03524e-14	1.23554e-13					hsa-mir-665	-1.07141	2.40352e-07	7.62736e-07
hsa-mir-561	-1.63762	6.55951e-15	9.00293e-14					hsa-mir-767	3.16659	3.05551e-07	9.5311e-07
hsa-mir-573	1.56272	1.05495e-07	3.9399e-07					hsa-mir-1229	1.05625	3.29472e-07	1.02192e-06
hsa-mir-585	-1.07911	3.06263e-05	8.12263e-05					hsa-mir-3176	1.08379	3.57778e-07	1.09998e-06
hsa-mir-592	1.43191	1.0651e-07	3.95095e-07					hsa-mir-323b	1.2968	3.58647e-07	1.09998e-06
hsa-mir-615	3.74956	1.19584e-30	6.56514e-28					hsa-mir-653	-1.05193	5.26616e-07	1.60618e-06
hsa-mir-616	1.08818	6.0638e-07	2.06772e-06					hsa-mir-105-2	3.03836	5.6511e-07	1.71406e-06
hsa-mir-636	1.31481	6.59789e-09	2.96905e-08					hsa-mir-891a	-1.8708	5.86249e-07	1.76841e-06
hsa-mir-642a	1.13801	6.26994e-06	1.87076e-05					hsa-mir-451	-1.26872	1.28685e-06	3.75787e-06
hsa-mir-653	-1.03043	8.9603e-07	2.95071e-06					hsa-mir-147b	1.15571	1.7281e-06	4.94129e-06
hsa-mir-654	-1.57178	5.43374e-11	3.72891e-10					hsa-mir-376a-1	-1.16093	1.85534e-06	5.27764e-06
hsa-mir-656	-1.08559	1.37695e-05	3.79873e-05					hsa-mir-3687	1.31808	2.01581e-06	5.64631e-06
hsa-mir-658	1.25739	8.03711e-08	3.12934e-07					hsa-mir-585	-1.10043	2.46171e-06	6.72376e-06
hsa-mir-663	1.21311	5.33528e-05	0.000130181					hsa-mir-3690	1.11621	2.81877e-06	7.66091e-06
hsa-mir-671	1.24339	2.81096e-23	1.92902e-21					hsa-mir-1-1	-1.45565	3.15503e-06	8.49073e-06
hsa-mir-676	-1.15256	7.12492e-08	2.81409e-07					hsa-mir-3144	1.08965	3.69119e-06	9.62904e-06
hsa-mir-7-2	1.40616	8.71908e-08	3.34739e-07					hsa-mir-433	-1.05525	4.13779e-06	1.05658e-05
hsa-mir-7-3	1.58851	3.41486e-10	2.06017e-09					hsa-mir-639	1.00022	5.03794e-06	1.28048e-05
hsa-mir-708	1.20903	7.25629e-10	4.065e-09					hsa-mir-504	-1.13573	5.29698e-06	1.33396e-05
hsa-mir-766	1.18056	1.15925e-14	1.30726e-13					hsa-mir-187	1.5824	6.95062e-06	1.71887e-05
hsa-mir-767	2.39551	0.000139884	0.000315698					hsa-mir-483	1.0157	7.47354e-06	1.8399e-05
hsa-mir-877	1.92479	1.12135e-15	1.75892e-14					hsa-mir-656	-1.00223	7.57246e-06	1.85593e-05
hsa-mir-885	-2.00253	4.44464e-11	3.08874e-10					hsa-mir-144	-1.12599	7.88487e-06	1.90639e-05
hsa-mir-891a	-2.21495	6.02957e-10	3.41261e-09					hsa-mir-496	-1.01228	8.75312e-06	2.07132e-05
hsa-mir-9-1	1.15947	0.00208987	0.00355213					hsa-mir-663	1.20786	9.55988e-06	2.25252e-05
hsa-mir-9-2	1.1782	0.00172209	0.00295445					hsa-mir-1269	2.71165	1.50167e-05	3.50815e-05
hsa-mir-92a-1	1.11691	2.2414e-09	1.13938e-08					hsa-mir-3607	1.16725	3.82261e-05	8.67196e-05
hsa-mir-93	1.42199	5.0944e-14	4.99433e-13					hsa-mir-206	-2.79101	4.74042e-05	0.000104939
hsa-mir-937	2.109	1.37192e-15	2.09217e-14					hsa-mir-9-1	1.57413	5.43274e-05	0.000118356
hsa-mir-940	1.32139	1.85052e-09	9.67558e-09					hsa-mir-9-2	1.57543	5.7534e-05	0.000124355
hsa-mir-944	1.44388	3.74248e-10	2.18577e-09					hsa-mir-34b	1.05547	7.81798e-05	0.000166359
hsa-mir-96	1.24697	1.04897e-11	7.67847e-11					hsa-mir-873	1.02427	0.000169451	0.000345832
hsa-mir-99a	-2.34125	4.78085e-21	2.18724e-19					hsa-mir-508	-1.20656	0.00248381	0.00424801
								hsa-mir-10a	-1.06556	0.000413779	0.0105658
								hsa-let-7a-2	1.60237	8.31985e-06	7.3671e-05
								hsa-let-7f-1	1.83157	3.35992e-11	1.84459e-10
