# Supplementary material for: Predictive models for stage and risk classification in head and neck squamous cell carcinoma (HNSCC)
Source: PeerJ. 2020 Sep 22;8:e9656. doi: 10.7717/peerj.9656 (PMC7518185; doi:10.7717/peerj.9656)
Supplement: Table S3 — A total of 148 miRNAs were common differentially expressed in early and late. In early 23 and 26 late-stage specific differential expressed miRNAs. [file peerj-08-9656-s003.xlsx]

## Sheet: Supl.Table 3
S Table - 3: The list of common and stage specific differentially expressed miRNAs
Early	Late	Early|Late
hsa-mir-181b-1	hsa-mir-140	hsa-mir-615
hsa-mir-766	hsa-mir-30e	hsa-mir-196b
hsa-mir-484	hsa-mir-125b-1	hsa-mir-101-1
hsa-mir-218-2	hsa-mir-190	hsa-mir-503
hsa-mir-3677	hsa-mir-1468	hsa-mir-21
hsa-mir-421	hsa-mir-1277	hsa-mir-1301
hsa-mir-342	hsa-mir-3622a	hsa-mir-455
hsa-mir-3614	hsa-mir-939	hsa-mir-671
hsa-mir-3136	hsa-mir-1274b	hsa-mir-1910
hsa-mir-425	hsa-mir-548b	hsa-mir-196a-1
hsa-mir-1537	hsa-mir-3691	hsa-mir-196a-2
hsa-mir-658	hsa-mir-665	hsa-mir-99a
hsa-mir-1237	hsa-mir-1229	hsa-mir-195
hsa-mir-3911	hsa-mir-3176	hsa-mir-101-2
hsa-mir-3917	hsa-mir-451	hsa-mir-550a-1
hsa-mir-3610	hsa-mir-1-1	hsa-mir-204
hsa-mir-512-2	hsa-mir-639	hsa-mir-30a
hsa-mir-520f	hsa-mir-483	hsa-let-7c
hsa-mir-519a-1	hsa-mir-144	hsa-mir-130b
hsa-mir-512-1	hsa-mir-496	hsa-mir-375
hsa-mir-514-1	hsa-mir-3607	hsa-mir-301a
hsa-mir-514-3	hsa-mir-206	hsa-mir-139
hsa-mir-514-2	hsa-mir-873	hsa-mir-210
	hsa-mir-10a	hsa-mir-1307
	hsa-let-7a-2	hsa-mir-1306
	hsa-let-7f-1	hsa-mir-2355
		hsa-mir-193b
		hsa-mir-18a
		hsa-mir-100
		hsa-mir-135a-1
		hsa-mir-424
		hsa-mir-224
		hsa-mir-877
		hsa-mir-937
		hsa-mir-450a-2
		hsa-mir-1258
		hsa-mir-29c
		hsa-mir-561
		hsa-mir-324
		hsa-mir-410
		hsa-mir-454
		hsa-mir-301b
		hsa-mir-1305
		hsa-mir-550a-2
		hsa-mir-1293
		hsa-mir-411
		hsa-mir-450a-1
		hsa-mir-381
		hsa-mir-26a-2
		hsa-mir-3934
		hsa-mir-93
		hsa-mir-3928
		hsa-mir-125b-2
		hsa-mir-450b
		hsa-mir-379
		hsa-mir-3922
		hsa-mir-3648
		hsa-mir-378c
		hsa-mir-378
		hsa-mir-29a
		hsa-mir-16-2
		hsa-mir-183
		hsa-mir-205
		hsa-mir-31
		hsa-mir-96
		hsa-mir-383
		hsa-mir-885
		hsa-mir-654
		hsa-mir-135b
		hsa-mir-1254
		hsa-mir-181b-2
		hsa-mir-3662
		hsa-mir-3940
		hsa-mir-7-3
		hsa-mir-3619
		hsa-mir-944
		hsa-mir-3170
		hsa-mir-136
		hsa-mir-337
		hsa-mir-891a
		hsa-mir-708
		hsa-mir-3129
		hsa-mir-3074
		hsa-mir-376c
		hsa-mir-320b-2
		hsa-mir-940
		hsa-mir-143
		hsa-mir-92a-1
		hsa-mir-369
		hsa-mir-495
		hsa-mir-127
		hsa-mir-299
		hsa-mir-323b
		hsa-mir-548f-1
		hsa-mir-636
		hsa-mir-487b
		hsa-mir-19a
		hsa-mir-182
		hsa-mir-3652
		hsa-mir-377
		hsa-mir-142
		hsa-mir-676
		hsa-mir-1292
		hsa-mir-7-2
		hsa-mir-3651
		hsa-mir-3926-1
		hsa-mir-573
		hsa-mir-592
		hsa-mir-432
		hsa-mir-3690
		hsa-mir-499
		hsa-mir-216a
		hsa-mir-20a
		hsa-mir-486
		hsa-mir-2277
		hsa-mir-616
		hsa-mir-653
		hsa-mir-545
		hsa-mir-4326
		hsa-mir-147b
		hsa-mir-202
		hsa-mir-642a
		hsa-mir-433
		hsa-mir-1245
		hsa-mir-548k
		hsa-mir-3687
		hsa-mir-1247
		hsa-mir-376a-1
		hsa-mir-656
		hsa-mir-1-2
		hsa-mir-3144
		hsa-mir-585
		hsa-mir-217
		hsa-mir-105-1
		hsa-mir-663
		hsa-mir-1269
		hsa-mir-767
		hsa-mir-504
		hsa-mir-508
		hsa-mir-105-2
		hsa-mir-208b
		hsa-mir-187
		hsa-mir-133b
		hsa-mir-133a-1
		hsa-mir-34b
		hsa-mir-133a-2
		hsa-mir-9-2
		hsa-mir-9-1
