# Supplementary material for: Predictive models for stage and risk classification in head and neck squamous cell carcinoma (HNSCC)
Source: PeerJ. 2020 Sep 22;8:e9656. doi: 10.7717/peerj.9656 (PMC7518185; doi:10.7717/peerj.9656)
Supplement: Table S4 — List of top 20 miRNA as an important feature variable for classification of early and late stages based on an expression. The best feature prediction showed AdaptiveBoost, Random Forest, Support Vector Machine and Average Neural Network. [file peerj-08-9656-s004.xlsx]

## Sheet: S Table 4
S Table – 4: The top 20 important features identified by each machine learning algorithm (svmRadial, avNNet, Adaboost and RF).
svmR
Variables	importance_predictor
hsa-mir-342	100
hsa-let-7c	96.62
hsa-mir-133b	95.93
hsa-mir-218-2	94.99
hsa-mir-1-2	93.37
hsa-mir-133a-1	87.48
hsa-mir-3129	84.96
hsa-mir-519a-1	84.87
hsa-mir-142	81.26
hsa-mir-101-2	80.41
hsa-mir-29c	79.46
hsa-mir-766	73.54
hsa-mir-208b	73.5
hsa-mir-512-2	72.45
hsa-mir-96	71.08
hsa-mir-196a	70.67
hsa-mir-3614	69.11
hsa-mir-708	68.96
hsa-mir-520f	67.92
hsa-mir-105-1	67.55
RF
hsa-mir-1307	100
hsa-mir-29c	96.45
hsa-mir-96	88.43
hsa-let-7c	87.75
hsa-mir-1-2	83.98
hsa-mir-133a-1	82.54
hsa-mir-663	82.39
hsa-mir-378	81.15
hsa-mir-411	79.53
hsa-mir-299	78.52
hsa-mir-1247	78.41
hsa-mir-519a-1	76.8
hsa-mir-196a	76.73
hsa-mir-767	75.35
hsa-mir-520f	75.07
hsa-mir-375	74.3
hsa-mir-133a-2	73.88
hsa-mir-3677	73.21
hsa-mir-486	72.46
hsa-mir-676	72.3
AdaBoost
hsa-mir-342	100
hsa-mir-139	96.62
hsa-mir-133b	95.93
hsa-mir-196a	94.99
hsa-mir-133a-1	93.37
hsa-mir-1-2	87.48
hsa-mir-29c	84.96
hsa-mir-519a-1	84.87
hsa-let-7c	81.26
hsa-mir-133a-2	80.41
hsa-mir-1237	79.46
hsa-mir-766	73.54
hsa-mir-208b	73.5
hsa-mir-512-2	72.45
hsa-mir-3136	71.08
hsa-mir-1537	70.67
hsa-mir-96	69.11
hsa-mir-708	68.96
hsa-mir-142	67.92
hsa-mir-105-1	67.55
avNNet
hsa-mir-342	100
hsa-mir-139	96.62
hsa-mir-133b	95.93
hsa-mir-29c	94.99
hsa-mir-133a-1	93.37
hsa-mir-133a-2	87.48
hsa-mir-3129	84.96
hsa-mir-519a-1	84.87
hsa-mir-142	81.26
hsa-mir-1-2	80.41
hsa-mir-1237	79.46
hsa-mir-766	73.54
hsa-mir-208b	73.5
hsa-mir-512-2	72.45
hsa-mir-3136	71.08
hsa-mir-196a	70.67
hsa-mir-96	69.11
hsa-mir-708	68.96
hsa-let-7c	67.92
hsa-mir-105-1	67.55
