# Supplementary material for: Predictive models for stage and risk classification in head and neck squamous cell carcinoma (HNSCC)
Source: PeerJ. 2020 Sep 22;8:e9656. doi: 10.7717/peerj.9656 (PMC7518185; doi:10.7717/peerj.9656)
Supplement: Table S5 — The details of the model performance of individual algorithms i.e., SVM, RF, AdaBoost, avNNet, and GBM. [file peerj-08-9656-s005.xlsx]

## Sheet: S Table 5
S Table – 5: Details of internal cross validation for diagnostic signature (ROC, Sensitivity, Specificity, Accuracy) over and under sampling.
Oversamling									Undersampling
RF									RF
Model	ROC	Sens	Spec	ROCSD	SensSD	SpecSD			ROC	Sens	Spec	ROCSD	SensSD	SpecSD
1	0.946171	0.800563	0.903122	0.0268797	0.0896648	0.0487496			0.81895	0.8339286 0	0.879047	6 0.13347	0.179017	3 0.183562
2	0.941595	0.805411	0.900238	0.0310324	0.0938162	0.0582508			0.822411	0.7400000 0	0.870952	4 0.13658	0.15614	8 0.175273
3	0.938282	0.798658	0.893704	0.0292928	0.0897367	0.0630432			0.760706	0.7450000 0	0.884761	9 0.13709	0.153699	4 0.179181
4	0.934359	0.795065	0.895132	0.0332164	0.0848696	0.0595445			0.768567	0.7985714 0	0.776666	7 0.13113	0.174991	8 0.182921
5	0.930799	0.796797	0.890794	0.0349687	0.091523	0.0623423			0.758299	0.7364286 0	0.772381	0 0.12576	0.16432	6 0.172872
6	0.927097	0.792121	0.890079	0.0359289	0.0977392	0.0612287			0.757942	0.7360714 0	0.87619	5 0.13544	0.154806	8 0.190961
7	0.928901	0.777576	0.894524	0.0344122	0.0929163	0.0638939			0.857666	0.8446429 0	0.773333	3 0.14168	0.163315	1 0.168773
8	0.929474	0.78658	0.888624	0.0343	0.0904473	0.0590441			0.748389	0.7314286 0	0.867	0 0.13088	0.153314	4 0.201457
9	0.929106	0.794069	0.889471	0.0354918	0.0888194	0.0619637			0.742309	0.7335714 0	0.854761	9 0.12978	0.1412	3 0.199335
10	0.929062	0.794113	0.894444	0.0341501	0.0834199	0.0560884			0.743384	0.7314286 0	0.764143	6 0.12703	0.15584	4 0.180073
SVM Radial									svm Radial
Model	ROC	Sens	Spec	ROCSD	SensSD	SpecSD			ROC	Sens	Spec	ROCSD	SensSD	SpecSD
1	0.755692	0.591385	0.762989	0.0555099	0.112736	0.755692			0.676675	0.723214	0.772857	0.180026	0.210587	0.260003
2	0.787976	0.637273	0.79127	0.0548612	0.111899	0.787976			0.719847	0.721071	0.779048	0.166154	0.193067	0.243943
3	0.817465	0.704459	0.802963	0.047666	0.102423	0.817465			0.716174	0.7175	0.741571	0.176107	0.204263	0.255315
4	0.841509	0.72013	0.810132	0.0450188	0.0972521	0.841509			0.693137	0.67	0.776667	0.161501	0.195889	0.212713
5	0.865447	0.757965	0.832672	0.0416567	0.0823018	0.865447			0.673112	0.69	0.76381	0.161175	0.195773	0.207356
6	0.885731	0.797706	0.853095	0.0385513	0.0834022	0.885731			0.706556	0.642143	0.780476	0.153998	0.191953	0.185783
7	0.901225	0.805801	0.86381	0.0392996	0.0786792	0.901225			0.737951	0.714643	0.77	0.170174	0.193121	0.242181
8	0.906764	0.821429	0.87828	0.0393112	0.0652395	0.906764			0.75017	0.635	0.796667	0.139975	0.162392	0.191409
9	0.907402	0.833507	0.876878	0.0387401	0.0754596	0.907402			0.789881	0.651071	0.712857	0.134474	0.14832	0.192819
10	0.902775	0.841732	0.876958	0.0357237	0.0830097	0.902775			0.88693	0.768214	0.793809	0.133715	0.155374	0.164466
AdaBoost									AdaBoost
Model	ROC	Sens	Spec	ROCSD	SensSD	SpecSD			ROC	Sens	Spec	ROCSD	SensSD	SpecSD
1	0.936393	0.833939	0.876852	0.029109	0.0572991	0.0649528			0.873384	0.731429	0.641429	0.127034	0.15584	0.180074
2	0.939576	0.840173	0.878148	0.02842	0.0604487	0.0688789			0.772309	0.733571	0.654762	0.129786	0.1412	0.199335
3	0.942098	0.846753	0.878783	0.0291038	0.0602532	0.0650564			0.888389	0.731429	0.67	0.130881	0.153314	0.201458
4	0.941517	0.855151	0.879524	0.0285853	0.0604494	0.0658106			0.857942	0.736071	0.676191	0.135444	0.154807	0.190962
5	0.942605	0.860779	0.880291	0.0273493	0.0533293	0.066041			0.860706	0.745	0.684762	0.137091	0.153699	0.179182
6	0.942815	0.857965	0.881746	0.0268492	0.0521371	0.0662465			0.858299	0.736429	0.672381	0.125761	0.164321	0.172872
7	0.943508	0.855238	0.880265	0.0270325	0.0515112	0.0631861			0.818567	0.738571	0.676667	0.131137	0.174992	0.182922
8	0.943763	0.855151	0.878836	0.0265006	0.0575917	0.0657124			0.817666	0.744643	0.673333	0.141683	0.163315	0.168773
9	0.943663	0.852424	0.881005	0.026477	0.0565984	0.0643811			0.862411	0.74	0.670952	0.13659	0.156141	0.175273
10	0.943699	0.856147	0.88463	0.0263529	0.054587	0.0620732			0.85895	0.733929	0.679048	0.133479	0.179017	0.183563
avNNet									avNNet
Model	ROC	Sens	Spec	ROCSD	SensSD	SpecSD			ROC	Sens	Spec	ROCSD	SensSD	SpecSD
1	0.649368	0.804242	0.463968	0.0667087	0.111564	0.127664			0.725833	0.748235	0.720833	0.193412	0.234515	0.260512
2	0.635235	0.778528	0.478254	0.0739425	0.145275	0.141545			0.711892	0.694167	0.7575	0.195423	0.238807	0.24836
3	0.605982	0.74316	0.475608	0.0875672	0.0915846	0.11257			0.700208	0.687083	0.712917	0.206515	0.24292	0.259641
4	0.813759	0.633636	0.839656	0.0616816	0.11701	0.088105			0.714774	0.666667	0.660125	0.218063	0.251461	0.266273
5	0.806989	0.675844	0.814206	0.0651506	0.0975508	0.0801014			0.695694	0.69125	0.660875	0.226497	0.237589	0.270863
6	0.771557	0.618442	0.801138	0.0607286	0.0989709	0.0739808			0.648646	0.672917	0.657375	0.219919	0.249362	0.261152
7	0.852956	0.696277	0.851429	0.0484973	0.102514	0.063503			0.661701	0.67375	0.658042	0.233551	0.24152	0.27037
8	0.848187	0.70961	0.855714	0.051537	0.0982129	0.0672575			0.643646	0.653333	0.698333	0.225223	0.237977	0.277753
9	0.82017	0.691212	0.80873	0.0493567	0.0964805	0.0880412			0.638507	0.682083	0.6555	0.217236	0.242284	0.249293
10	0.649368	0.804242	0.463968	0.0667087	0.111564	0.127664			0.794774	0.766667	0.750125	0.218063	0.251461	0.266273
GBM									GBM
1	0.8600392	0.7655476	0.7975181	0.068542	0.125488	0.189452			0.7652849	0.6888095	0.6998214	0.184272	0.245817	0.254833
2	0.8709708	0.7660476	0.7979529	0.054182	0.0705147	0.021481			0.7627679	0.6966667	0.6514286	0.185248	0.267589	0.258736
3	0.8415511	0.7560000	0.7279710	0.084567	0.0705521	0.023651			0.7631590	0.6752381	0.6546429	0.114752	0.147854	0.28742
4	0.8432886	0.7186905	0.7805797	0.036581	0.105488	0.148724			0.7594345	0.6880952	0.6460714	0.152486	0.172597	0.258742
5	0.8607413	0.7492381	0.7969746	0.059831	0.183266	0.025487			0.7645706	0.6900000	0.6778575	0.145833	0.148592	0.124856
6	0.8642729	0.7612143	0.8021558	0.063241	0.114527	0.124681			0.7645366	0.6369048	0.6489286	0.163284	0.147584	0.147852
7	0.8679668	0.7631190	0.8025906	0.012357	0.0428771	0.054831			0.7559566	0.6861905	0.6350000	0.147513	0.248272	0.215488
8	0.8699971	0.7790476	0.7887138	0.054878	0.142025	0.0368914			0.7686054	0.6552381	0.6426786	0.958147	0.158664	0.178924
9	0.8709921	0.7695952	0.7996014	0.0235618	0.025481	0.021584			0.7662883	0.6759524	0.6532143	0.995482	0.157835	0.257416
10	0.8727072	0.7795000	0.7969746	0.025489	0.023615	0.024175			0.7661650	0.6938095	0.6851786	0.102584	0.145785	0.215746
