# Supplementary material for: Predictive models for stage and risk classification in head and neck squamous cell carcinoma (HNSCC)
Source: PeerJ. 2020 Sep 22;8:e9656. doi: 10.7717/peerj.9656 (PMC7518185; doi:10.7717/peerj.9656)
Supplement: Table S6 — The LASSO based Cox proportional hazard regression was performed for the assessment of the prognostic value of patients. The star represent the significance of the p-value stastistics (* = 0.05, ** = 0.005 and *** = 0.0005). [file peerj-08-9656-s006.xlsx]

## Sheet: S Table 6
S Table – 6: Lasso_Cox proportional hazard regression analysis for prognostic marker identification.
	coef	exp(coef)	se(coef)	z	Pr(>|z|)
hsa.mir.133b	-0.4604	0.631	0.4274	-1.077	0.281298
hsa.mir.142	-0.4377	0.6455	0.2617	-1.673	0.094357	.
hsa.mir.183	1.392	4.023	0.5987	2.325	0.020063	*
hsa.mir.29c	0.5633	1.756	0.2571	2.191	0.02844	*
hsa.mir.486	-0.1863	0.83	0.1225	-1.521	0.128311
hsa.mir.96	-1.996	0.1358	0.4101	-4.867	1.13e-06	***
hsa.let.7c	0.02617	1.027	0.5031	0.052	0.00018	***
hsa.mir.1.2	-0.2693	0.7639	0.2655	-1.014	0.310503
hsa.mir.100	0.7018	2.017	0.2305	3.045	0.002327	**
hsa.mir.101.1	0.4197	1.521	0.446	0.941	0.346719
hsa.mir.101.2	0.104	1.11	0.426	0.244	0.807202
hsa.mir.105.1	0.5468	1.728	0.4364	1.253	0.21028
hsa.mir.105.2	-1.157	0.3144	0.4675	-2.475	0.013326	*
hsa.mir.1237	-0.8833	0.4134	0.644	-1.372	0.17019
hsa.mir.1245	0.07892	1.082	0.2484	0.318	0.750717
hsa.mir.1247	-0.2498	0.7789	0.09148	-2.731	0.006313	**
hsa.mir.1254	0.5386	1.714	0.2996	1.798	0.072182	.
hsa.mir.1258	-0.1375	0.8716	0.2572	-0.534	0.593061
hsa.mir.125b.2	0.5338	1.705	0.2886	1.85	0.064348	.
hsa.mir.1269	-0.1231	0.8842	0.04349	-2.83	0.004661	**
hsa.mir.127	0.1168	1.124	0.5854	0.199	0.841887
hsa.mir.1292	0.07384	1.077	0.3378	0.219	0.826977
hsa.mir.1293	-0.05383	0.9476	0.1279	-0.421	0.673828
hsa.mir.1301	0.4109	1.508	0.3057	1.344	0.178876
hsa.mir.1305	0.02401	1.024	0.2327	0.103	0.917829
hsa.mir.1306	0.1973	1.218	0.3101	0.636	0.524492
hsa.mir.1307	0.1482	1.16	0.3272	0.453	0.650649
hsa.mir.130b	-0.2044	0.8152	0.3419	-0.598	0.549966
hsa.mir.133a.1	0.2262	1.254	0.3885	0.582	0.56043
hsa.mir.133a.2	0.834	2.303	0.3771	2.212	0.026986	*
hsa.mir.133b.1	NA	NA	0	NA	NA
hsa.mir.135a.1	-0.1453	0.8648	0.245	-0.593	0.553252
hsa.mir.135b	-0.2948	0.7447	0.1642	-1.795	0.072597	.
hsa.mir.136	0.8306	2.295	0.4391	1.892	0.058521	.
hsa.mir.139	-0.3593	0.6982	0.2197	-1.635	0.102002
hsa.mir.142.1	NA	NA	0	NA	NA
hsa.mir.143	1.361	3.899	0.3463	3.93	8.5e-05	***
hsa.mir.147b	0.5909	1.806	0.2381	2.481	0.013094	*
hsa.mir.1537	0.1173	1.125	0.4501	0.261	0.794319
hsa.mir.16.2	-0.04311	0.9578	0.3487	-0.124	0.901612
hsa.mir.181b.1	-0.01755	0.9826	0.3469	-0.051	0.959648
hsa.mir.181b.2	-0.9767	0.3765	0.3072	-3.18	0.001475	**
hsa.mir.182	-0.1771	0.8377	0.6107	-0.29	0.771861
hsa.mir.183.1	NA	NA	0	NA	NA
hsa.mir.187	-0.09699	0.9076	0.0789	-1.229	0.218962
hsa.mir.18a	0.4995	1.648	0.4213	1.186	0.235806
hsa.mir.1910	-0.05373	0.9477	0.2304	-0.233	0.815578
hsa.mir.193b	0.6877	1.989	0.2236	3.075	0.002102	**
hsa.mir.195	-0.5454	0.5796	0.2744	-1.987	0.046893	*
hsa.mir.196a.1	0.0325	1.033	0.1535	0.212	0.83239
hsa.mir.196a.2	0.3507	1.42	0.2436	1.44	0.149934
hsa.mir.196b	0.07945	1.083	0.1284	0.619	0.53594
hsa.mir.19a	0.2463	1.279	0.4214	0.584	0.558941
hsa.mir.202	0.2331	1.262	0.3613	0.645	0.518886
hsa.mir.204	0.2743	1.316	0.1189	2.307	0.021051	*
hsa.mir.205	-0.3409	0.7111	0.2728	-1.25	0.211395
hsa.mir.208b	-0.7423	0.476	0.3125	-2.376	0.017525	*
hsa.mir.20a	-0.776	0.4602	0.5563	-1.395	0.163027
hsa.mir.21	0.2921	1.339	0.416	0.702	0.482633
hsa.mir.210	0.5041	1.655	0.1782	2.828	0.004682	**
hsa.mir.216a	0.4076	1.503	0.4228	0.964	0.334999
hsa.mir.217	-0.3983	0.6714	0.1967	-2.025	0.042855	*
hsa.mir.218.2	0.5776	1.782	0.1893	3.051	0.002282	**
hsa.mir.224	0.1178	1.125	0.1436	0.821	0.411895
hsa.mir.2277	0.09957	1.105	0.3082	0.323	0.746612
hsa.mir.2355	0.2128	1.237	0.2357	0.903	0.366578
hsa.mir.26a.2	-0.3782	0.6851	0.5585	-0.677	0.498339
hsa.mir.299	0.3403	1.405	0.2867	1.187	0.235319
hsa.mir.29a	-0.8319	0.4352	0.3844	-2.164	0.03046	*
hsa.mir.29c.1	NA	NA	0	NA	NA
hsa.mir.301a	0.1697	1.185	0.3432	0.494	0.621039
hsa.mir.301b	-0.6986	0.4973	0.2997	-2.331	0.019739	*
hsa.mir.3074	-0.1421	0.8675	0.229	-0.621	0.534824
hsa.mir.30a	0.4241	1.528	0.1694	2.504	0.012292	*
hsa.mir.31	0.2895	1.336	0.08545	3.388	0.007003	**
hsa.mir.3129	0.2499	1.284	0.2915	0.858	0.391163
hsa.mir.3136	-0.7673	0.4643	0.363	-2.114	0.034544	*
hsa.mir.3144	0.1773	1.194	0.2918	0.608	0.543311
hsa.mir.3170	0.5381	1.713	0.3096	1.738	0.082185	.
hsa.mir.320b.2	-0.08173	0.9215	0.2293	-0.356	0.721491
hsa.mir.323b	0.1168	1.124	0.2289	0.51	0.610031
hsa.mir.324	-1.214	0.2969	0.347	-3.5	0.00466	**
hsa.mir.337	1.508	4.516	0.3718	4.055	0.020744	*
hsa.mir.342	1.098	2.999	0.3224	3.406	0.006607	**
hsa.mir.34b	0.09849	1.104	0.119	0.827	0.407957
hsa.mir.3610	-0.0006177	0.9994	0.3006	-0.002	0.998361
hsa.mir.3614	0.3092	1.362	0.2012	1.537	0.124287
hsa.mir.3619	-1.508	0.2213	0.3768	-4.003	0.00605	**
hsa.mir.3648	-0.1418	0.8678	0.1541	-0.92	0.357457
hsa.mir.3651	0.2488	1.283	0.2482	1.002	0.316146
hsa.mir.3652	-0.52	0.5945	0.2483	-2.094	0.036228	*
hsa.mir.3662	0.4767	1.611	0.2346	2.033	0.042103	*
hsa.mir.3677	-0.5619	0.5701	0.2635	-2.133	0.032953	*
hsa.mir.3687	-0.04399	0.957	0.2475	-0.178	0.858914
hsa.mir.369	0.2117	1.236	0.3876	0.546	0.584884
hsa.mir.3690	-0.2306	0.7941	0.205	-1.125	0.260664
hsa.mir.375	0.02749	1.028	0.07982	0.344	0.730512
hsa.mir.376a.1	-0.3839	0.6812	0.3459	-1.11	0.267073
hsa.mir.376c	-1.141	0.3194	0.4294	-2.658	0.007856	**
hsa.mir.377	0.5455	1.726	0.356	1.532	0.125465
hsa.mir.378	-0.7431	0.4756	0.2852	-2.605	0.009184	**
hsa.mir.378c	0.4616	1.587	0.3296	1.401	0.161357
hsa.mir.379	-2.938	0.05299	0.7182	-4.09	4.31e-05	***
hsa.mir.381	0.2549	1.29	0.3622	0.704	0.481547
hsa.mir.383	0.402	1.495	0.1721	2.337	0.019458	*
hsa.mir.3911	-0.4623	0.6299	0.4317	-1.071	0.284251
hsa.mir.3917	0.1635	1.178	0.2334	0.7	0.483691
hsa.mir.3922	0.2135	1.238	0.298	0.717	0.473646
hsa.mir.3926.1	-1.446	0.2355	0.3791	-3.815	0.000136	***
hsa.mir.3928	0.1007	1.106	0.2842	0.354	0.722986
hsa.mir.3934	-0.2747	0.7598	0.2679	-1.025	0.30527
hsa.mir.3940	-0.6705	0.5115	0.2419	-2.771	0.005585	**
hsa.mir.410	0.0005244	1.001	0.333	0.002	0.998743
hsa.mir.411	-0.05755	0.9441	0.3576	-0.161	0.872158
hsa.mir.421	0.06918	1.072	0.2634	0.263	0.792841
hsa.mir.424	1.07	2.915	0.3165	3.381	0.00723	**
hsa.mir.425	-0.2333	0.7919	0.2903	-0.804	0.421671
hsa.mir.432	-0.3627	0.6958	0.3412	-1.063	0.287805
hsa.mir.4326	-0.06335	0.9386	0.1074	-0.59	0.555211
hsa.mir.433	-0.8084	0.4456	0.3244	-2.492	0.012699	*
hsa.mir.450a.1	-0.5502	0.5769	0.3545	-1.552	0.120717
hsa.mir.450a.2	0.06297	1.065	0.3837	0.164	0.869645
hsa.mir.450b	-0.2995	0.7412	0.3371	-0.888	0.374389
hsa.mir.454	0.3403	1.405	0.3732	0.912	0.361972
hsa.mir.455	0.01362	1.014	0.2326	0.059	0.953324
hsa.mir.484	0.5322	1.703	0.3401	1.565	0.117677
hsa.mir.486.1	NA	NA	0	NA	NA
hsa.mir.487b	-0.4842	0.6162	0.3726	-1.3	0.193745
hsa.mir.495	0.01633	1.016	0.3231	0.051	0.959686
hsa.mir.499	0.7301	2.075	0.2581	2.829	0.004675	**
hsa.mir.503	-0.5639	0.569	0.269	-2.096	0.036061	*
hsa.mir.504	-0.2551	0.7748	0.3154	-0.809	0.418574
hsa.mir.508	-0.09741	0.9072	0.2031	-0.48	0.631575
hsa.mir.512.1	-0.5048	0.6036	0.3674	-1.374	0.169435
hsa.mir.512.2	0.2272	1.255	0.3831	0.593	0.55327
hsa.mir.514.1	-0.4904	0.6124	0.4197	-1.169	0.242602
hsa.mir.514.2	0.08082	1.084	0.3831	0.211	0.832911
hsa.mir.514.3	0.6126	1.845	0.3791	1.616	0.106073
hsa.mir.519a.1	-0.03399	0.9666	0.1579	-0.215	0.829575
hsa.mir.520f	0.1084	1.114	0.3647	0.297	0.76636
hsa.mir.545	-1.249	0.2867	0.3746	-3.335	0.000853	***
hsa.mir.548f.1	-0.01154	0.9885	0.1782	-0.065	0.948392
hsa.mir.548k	0.3875	1.473	0.2636	1.47	0.141525
hsa.mir.550a.1	-0.3047	0.7373	0.3771	-0.808	0.41908
hsa.mir.550a.2	0.3944	1.483	0.3214	1.227	0.219873
hsa.mir.561	0.6677	1.95	0.3359	1.988	0.046848	*
hsa.mir.573	-0.7497	0.4725	0.3085	-2.43	0.015099	*
hsa.mir.585	-0.08051	0.9226	0.2594	-0.31	0.756272
hsa.mir.592	-0.09361	0.9106	0.1825	-0.513	0.607996
hsa.mir.615	-0.1665	0.8466	0.1928	-0.864	0.387693
hsa.mir.616	0.2912	1.338	0.2869	1.015	0.310059
hsa.mir.636	-0.09055	0.9134	0.3983	-0.227	0.820167
hsa.mir.642a	-0.3851	0.6804	0.2153	-1.789	0.073632	.
hsa.mir.653	-0.3045	0.7375	0.1691	-1.801	0.07171	.
hsa.mir.654	1.107	3.024	0.3968	2.789	0.005289	**
hsa.mir.656	0.7759	2.172	0.3609	2.15	0.031574	*
hsa.mir.658	-1.909	0.1483	0.4711	-4.051	5.09e-05	***
hsa.mir.663	0.3227	1.381	0.3034	1.064	0.287518
hsa.mir.671	1.162	3.197	0.3288	3.534	0.004009	**
hsa.mir.676	0.3394	1.404	0.3216	1.055	0.291339
hsa.mir.7.2	-0.01865	0.9815	0.3061	-0.061	0.951415
hsa.mir.7.3	0.2066	1.23	0.3162	0.653	0.513454
hsa.mir.708	-0.5687	0.5662	0.2018	-2.818	0.004828	**
hsa.mir.766	-0.53	0.5886	0.2714	-1.953	0.050793	.
hsa.mir.767	0.5505	1.734	0.314	1.753	0.079606	.
hsa.mir.877	-0.1436	0.8663	0.2488	-0.577	0.5639
hsa.mir.891a	-0.07568	0.9271	0.1081	-0.7	0.483766
hsa.mir.9.1	6.593	730.3	1.871	3.524	0.000426	***
hsa.mir.9.2	-6.668	0.001271	1.861	-3.582	0.00341	**
hsa.mir.92a.1	0.4022	1.495	0.4588	0.877	0.380654
hsa.mir.93	0.2245	1.252	0.3367	0.667	0.504906
hsa.mir.937	0.3136	1.368	0.1599	1.961	0.049846	*
hsa.mir.940	0.6787	1.971	0.3015	2.251	0.024388	*
hsa.mir.944	0.3923	1.48	0.1792	2.189	0.028566	*
hsa.mir.96.1	NA	NA	0	NA	NA
hsa.mir.99a	-0.8661	0.4206	0.4636	-1.868	0.061736	.
Signif. codes:	0 ‘***’ 0	.001 ‘**’ 0	.01 ‘*’ 0.0	5 ‘.’ 0	.1 ‘ ’ 1
