# Supplementary material for: Predictive models for stage and risk classification in head and neck squamous cell carcinoma (HNSCC)
Source: PeerJ. 2020 Sep 22;8:e9656. doi: 10.7717/peerj.9656 (PMC7518185; doi:10.7717/peerj.9656)
Supplement: Table S7 — Details of the miRNAs target mRNAs and differential expressed log2FC. [file peerj-08-9656-s007.xlsx]

## Sheet: S Table 7
S Table – 7: The common target of the diagnostic signature miRNAs and differential expressed mRNAs (set 1)
© 2000-2020 QIAGEN. All rights reserved.
Expr Fold Change	ID	Entrez Gene Name	Type(s)
-1.635	ACPP	acid phosphatase, prostate	phosphatase
1.675	ACVR1C	activin A receptor type 1C	kinase
1.674	ADAMTS15	ADAM metallopeptidase with thrombospondin type 1 motif 15	peptidase
-2.213	ADAMTS8	ADAM metallopeptidase with thrombospondin type 1 motif 8	peptidase
1.142	ADAR	adenosine deaminase RNA specific	enzyme
1.307	ADRB3	adrenoceptor beta 3	G-protein coupled receptor
1.277	AGBL2	ATP/GTP binding protein like 2	enzyme
1.965	AGRN	agrin	other
-1.898	ANK2	ankyrin 2	other
2.104	ANO1	anoctamin 1	ion channel
-2.358	ANXA9	annexin A9	transmembrane receptor
-1.773	ARHGEF38	Rho guanine nucleotide exchange factor 38	other
1.086	ARID3A	AT-rich interaction domain 3A	transcription regulator
-1.091	ASAP3	ArfGAP with SH3 domain, ankyrin repeat and PH domain 3	other
-1.531	ATP6V1B1	ATPase H+ transporting V1 subunit B1	transporter
1.625	ATP8B3	ATPase phospholipid transporting 8B3	transporter
1.928	AURKB	aurora kinase B	kinase
1.175	AXL	AXL receptor tyrosine kinase	kinase
-2.924	AZGP1	alpha-2-glycoprotein 1, zinc-binding	transporter
-2.016	BEX4	brain expressed X-linked 4	other
1.188	BRCA1	BRCA1 DNA repair associated	transcription regulator
1.413	BRSK2	BR serine/threonine kinase 2	kinase
2.465	C1QL1	complement C1q like 1	other
-1.607	C2orf88	chromosome 2 open reading frame 88	other
1.961	C6orf141	chromosome 6 open reading frame 141	other
-4.994	C9orf152	chromosome 9 open reading frame 152	other
-1.77	CCDC110	coiled-coil domain containing 110	other
1.401	CCDC38	coiled-coil domain containing 38	other
-1.484	CCL2	C-C motif chemokine ligand 2	cytokine
1.003	CCL3	C-C motif chemokine ligand 3	cytokine
1.767	CCL7	C-C motif chemokine ligand 7	cytokine
1.712	CCNF	cyclin F	other
1.317	CCR7	C-C motif chemokine receptor 7	G-protein coupled receptor
1.435	CD177	CD177 molecule	other
-1.299	CD200R1	CD200 receptor 1	transmembrane receptor
1.476	CDK14	cyclin dependent kinase 14	kinase
1.407	CDK6	cyclin dependent kinase 6	kinase
-4.8	CFTR	CF transmembrane conductance regulator	ion channel
2.435	CHST11	carbohydrate sulfotransferase 11	enzyme
1.337	CKS1B	CDC28 protein kinase regulatory subunit 1B	kinase
2.232	CLDN14	claudin 14	other
1.86	CLEC1B	C-type lectin domain family 1 member B	transmembrane receptor
3.706	CNTD2	cyclin N-terminal domain containing 2	other
1.021	CNTNAP1	contactin associated protein 1	other
3.559	COL1A2	collagen type I alpha 2 chain	other
2.059	COL27A1	collagen type XXVII alpha 1 chain	other
3.146	COL4A2	collagen type IV alpha 2 chain	other
-1.515	CPEB3	cytoplasmic polyadenylation element binding protein 3	translation regulator
-1.067	CPEB4	cytoplasmic polyadenylation element binding protein 4	other
-1.252	CSTB	cystatin B	peptidase
3.799	CTHRC1	collagen triple helix repeat containing 1	other
1.606	CTSC	cathepsin C	peptidase
3.613	CXCL11	C-X-C motif chemokine ligand 11	cytokine
1.074	CYP19A1	cytochrome P450 family 19 subfamily A member 1	enzyme
-2.017	CYP2C19	cytochrome P450 family 2 subfamily C member 19	enzyme
-4.691	CYP4B1	cytochrome P450 family 4 subfamily B member 1	enzyme
-1.606	DBNDD1	dysbindin domain containing 1	other
-1.374	DDAH1	dimethylarginine dimethylaminohydrolase 1	enzyme
1.976	DEPDC1B	DEP domain containing 1B	other
-1.081	DHRS9	dehydrogenase/reductase 9	enzyme
2.146	DLEU7	deleted in lymphocytic leukemia 7	other
1.278	DLX3	distal-less homeobox 3	transcription regulator
1.009	DOCK5	dedicator of cytokinesis 5	other
-1.435	DUSP1	dual specificity phosphatase 1	phosphatase
-1.256	EDAR	ectodysplasin A receptor	transmembrane receptor
-1.101	EIF4E3	eukaryotic translation initiation factor 4E family member 3	translation regulator
2.189	ENPEP	glutamyl aminopeptidase	peptidase
1.113	EPB41L4B	erythrocyte membrane protein band 4.1 like 4B	transporter
2.698	EPSTI1	epithelial stromal interaction 1	other
-1.893	FA2H	fatty acid 2-hydroxylase	enzyme
2.309	FADS2	fatty acid desaturase 2	enzyme
-3.45	FAM107A	family with sequence similarity 107 member A	other
1.592	FBN1	fibrillin 1	other
-1.573	FHIT	fragile histidine triad diadenosine triphosphatase	enzyme
-5.189	FMO2	flavin containing dimethylaniline monoxygenase 2	enzyme
1.755	FNDC3B	fibronectin type III domain containing 3B	other
1.057	FOXN2	forkhead box N2	transcription regulator
-1.567	GABRB2	gamma-aminobutyric acid type A receptor beta2 subunit	ion channel
-2.017	GATM	glycine amidinotransferase	enzyme
1.869	GGT5	gamma-glutamyltransferase 5	enzyme
1.872	GJA1	gap junction protein alpha 1	transporter
1.434	GPR150	G protein-coupled receptor 150	G-protein coupled receptor
-2.595	GPX3	glutathione peroxidase 3	enzyme
1.4	GSDMA	gasdermin A	other
1.598	HLA-F	major histocompatibility complex, class I, F	transmembrane receptor
3.228	HMGA2	high mobility group AT-hook 2	enzyme
-2.465	HOPX	HOP homeobox	transcription regulator
2.555	HOXA1	homeobox A1	transcription regulator
2.135	HOXA7	homeobox A7	transcription regulator
1.337	HOXA9	homeobox A9	transcription regulator
-1.125	HOXB1	homeobox B1	transcription regulator
2.29	ICOS	inducible T cell costimulator	transmembrane receptor
2.055	IFI44	interferon induced protein 44	other
2.415	IFIT3	interferon induced protein with tetratricopeptide repeats 3	other
1.009	IGF1R	insulin like growth factor 1 receptor	transmembrane receptor
5.168	IGF2BP1	insulin like growth factor 2 mRNA binding protein 1	translation regulator
2.851	IGF2BP2	insulin like growth factor 2 mRNA binding protein 2	translation regulator
1.923	IGF2BP3	insulin like growth factor 2 mRNA binding protein 3	translation regulator
1.885	IQGAP3	IQ motif containing GTPase activating protein 3	other
1.313	ISLR	immunoglobulin superfamily containing leucine rich repeat	other
1.61	ITGB4	integrin subunit beta 4	transmembrane receptor
1.157	JAK3	Janus kinase 3	kinase
1.6	KCNG3	potassium voltage-gated channel modifier subfamily G member 3	ion channel
-3.211	KCNJ16	potassium inwardly rectifying channel subfamily J member 16	ion channel
1.722	KCNJ6	potassium inwardly rectifying channel subfamily J member 6	ion channel
1.079	KCTD17	potassium channel tetramerization domain containing 17	other
-1.809	KRT19	keratin 19	other
1.022	LASP1	LIM and SH3 protein 1	transporter
1.393	LIMD2	LIM domain containing 2	other
1.081	LOXL1	lysyl oxidase like 1	enzyme
1.358	LY6E	lymphocyte antigen 6 family member E	other
-1.22	LYVE1	lymphatic vessel endothelial hyaluronan receptor 1	transmembrane receptor
1.527	MET	MET proto-oncogene, receptor tyrosine kinase	kinase
1.076	MEX3B	mex-3 RNA binding family member B	kinase
-3.183	MFSD6L	major facilitator superfamily domain containing 6 like	other
1.212	MMD	monocyte to macrophage differentiation associated	kinase
-1.092	MRAP2	melanocortin 2 receptor accessory protein 2	other
1.206	MT1F	metallothionein 1F	other
1.44	NAT14	N-acetyltransferase 14 (putative)	other
2.345	NETO2	neuropilin and tolloid like 2	other
1.512	NGF	nerve growth factor	growth factor
2.806	NID2	nidogen 2	other
-2.042	NKX2-3	NK2 homeobox 3	transcription regulator
-2.37	NTRK3	neurotrophic receptor tyrosine kinase 3	kinase
-1.206	NYNRIN	NYN domain and retroviral integrase containing	other
-2.672	OGN	osteoglycin	growth factor
1.857	ONECUT1	one cut homeobox 1	transcription regulator
3.391	ONECUT2	one cut homeobox 2	transcription regulator
1.4	P4HA2	prolyl 4-hydroxylase subunit alpha 2	transporter
-1.703	PBX1	PBX homeobox 1	transcription regulator
1.209	PCDHB14	protocadherin beta 14	other
-1.16	PDCD4	programmed cell death 4	other
1.409	PDE7A	phosphodiesterase 7A	enzyme
-3.02	PDK4	pyruvate dehydrogenase kinase 4	kinase
1.405	PDLIM7	PDZ and LIM domain 7	other
-1.291	PFKFB1	6-phosphofructo-2-kinase/fructose-2,6-biphosphatase 1	kinase
-1.001	PGD	phosphogluconate dehydrogenase	enzyme
1.798	PHLDB2	pleckstrin homology like domain family B member 2	other
1.239	PIPOX	pipecolic acid and sarcosine oxidase	enzyme
-1.265	PIRT	phosphoinositide interacting regulator of transient receptor potential channels	other
-3.947	PLA2G2A	phospholipase A2 group IIA	enzyme
3.347	PLA2G2F	phospholipase A2 group IIF	enzyme
2.226	PLK1	polo like kinase 1	kinase
1.034	POLA2	DNA polymerase alpha 2, accessory subunit	enzyme
1.617	POU2F2	POU class 2 homeobox 2	transcription regulator
1.777	POU6F2	POU class 6 homeobox 2	transcription regulator
1.549	PRC1	protein regulator of cytokinesis 1	other
2.407	PRDM13	PR/SET domain 13	enzyme
-3.137	PRR15L	proline rich 15 like	other
1.116	PRRX1	paired related homeobox 1	transcription regulator
1.857	PSG1	pregnancy specific beta-1-glycoprotein 1	other
1.532	PTGS2	prostaglandin-endoperoxide synthase 2	enzyme
1.109	PTPRK	protein tyrosine phosphatase receptor type K	phosphatase
2.816	PXDN	peroxidasin	enzyme
1.63	RAB31	RAB31, member RAS oncogene family	enzyme
1.351	RAD54B	RAD54 homolog B	enzyme
-1.255	RARB	retinoic acid receptor beta	ligand-dependent nuclear receptor
1.659	RASD2	RASD family member 2	enzyme
-1.273	RBM47	RNA binding motif protein 47	other
-1.036	REG4	regenerating family member 4	other
1.121	RGS19	regulator of G protein signaling 19	enzyme
-2.481	RIC3	RIC3 acetylcholine receptor chaperone	other
-1.945	RNF150	ring finger protein 150	peptidase
1.549	RRM2	ribonucleotide reductase regulatory subunit M2	enzyme
1.005	RSRC1	arginine and serine rich coiled-coil 1	other
3.046	S100A7A	S100 calcium binding protein A7A	other
1.02	SAC3D1	SAC3 domain containing 1	other
2.888	SALL4	spalt like transcription factor 4	transcription regulator
1.078	SAMSN1	SAM domain, SH3 domain and nuclear localization signals 1	other
-1.065	SATB1	SATB homeobox 1	transcription regulator
1.914	SCN8A	sodium voltage-gated channel alpha subunit 8	ion channel
1.616	SELL	selectin L	transmembrane receptor
2.041	SFRP4	secreted frizzled related protein 4	transmembrane receptor
-1.518	SH2D1B	SH2 domain containing 1B	other
-1.091	SH2D4A	SH2 domain containing 4A	other
1.11	SH3PXD2B	SH3 and PX domains 2B	other
1.332	SHISA7	shisa family member 7	other
1.607	SIGLEC14	sialic acid binding Ig like lectin 14	other
1.2	SKIL	SKI like proto-oncogene	transcription regulator
-1.604	SLC16A9	solute carrier family 16 member 9	other
2.053	SLC17A9	solute carrier family 17 member 9	other
1.555	SLC1A4	solute carrier family 1 member 4	transporter
1.159	SLC44A1	solute carrier family 44 member 1	transporter
-1.579	SLC5A9	solute carrier family 5 member 9	transporter
2.308	SLC6A2	solute carrier family 6 member 2	transporter
1.079	SMOX	spermine oxidase	enzyme
1.959	SNAI2	snail family transcriptional repressor 2	transcription regulator
1.142	SNAP25	synaptosome associated protein 25	transporter
2.129	SOCS1	suppressor of cytokine signaling 1	other
1.165	SPHK1	sphingosine kinase 1	kinase
1.629	SSX4	SSX family member 4	other
1.517	STARD4	StAR related lipid transfer domain containing 4	transporter
1.155	SULT1E1	sulfotransferase family 1E member 1	enzyme
-1.231	SVOPL	SVOP like	other
-1.898	TAC1	tachykinin precursor 1	other
-2.044	TACR1	tachykinin receptor 1	G-protein coupled receptor
-1.681	TFF2	trefoil factor 2	other
-3.957	TFF3	trefoil factor 3	other
1.152	TFRC	transferrin receptor	transporter
3.708	TGFBI	transforming growth factor beta induced	other
1.079	TGFBR1	transforming growth factor beta receptor 1	kinase
-1.64	TGFBR3	transforming growth factor beta receptor 3	kinase
-2.628	THRSP	thyroid hormone responsive	other
1.115	TINAGL1	tubulointerstitial nephritis antigen like 1	transporter
-3.371	TJP3	tight junction protein 3	other
1.417	TMC7	transmembrane channel like 7	other
1.711	TMPRSS15	transmembrane serine protease 15	peptidase
1.22	TMSB10	thymosin beta 4 X-linked	other
2.66	TNC	tenascin C	other
1.049	TNFSF10	TNF superfamily member 10	cytokine
1.38	TNFSF13B	TNF superfamily member 13b	cytokine
1.028	TNFSF9	TNF superfamily member 9	cytokine
1.149	TNS4	tensin 4	other
1.914	TOP2A	DNA topoisomerase II alpha	enzyme
-1.163	TPPP	tubulin polymerization promoting protein	other
1.207	TREML1	triggering receptor expressed on myeloid cells like 1	other
-1.209	TRIM2	tripartite motif containing 2	enzyme
1.317	TRIM9	tripartite motif containing 9	enzyme
2.686	TRPA1	transient receptor potential cation channel subfamily A member 1	transporter
1.053	TTPAL	alpha tocopherol transfer protein like	other
1.253	TYMS	thymidylate synthetase	enzyme
2.042	UHRF1	ubiquitin like with PHD and ring finger domains 1	transcription regulator
-2.937	UPK1A	uroplakin 1A	other
-1.414	UTY	ubiquitously transcribed tetratricopeptide repeat containing, Y-linked	enzyme
2.161	WFDC12	WAP four-disulfide core domain 12	other
-1.921	ZBTB16	zinc finger and BTB domain containing 16	transcription regulator
1.353	ZNF281	zinc finger protein 281	transcription regulator
-1.614	ZNF415	zinc finger protein 415	transcription regulator
-1.384	ZNF582	zinc finger protein 582	other
1.386	ZNF80	zinc finger protein 80	transcription regulator
