# Supplementary material for: Predictive models for stage and risk classification in head and neck squamous cell carcinoma (HNSCC)
Source: PeerJ. 2020 Sep 22;8:e9656. doi: 10.7717/peerj.9656 (PMC7518185; doi:10.7717/peerj.9656)
Supplement: Table S8 — Details of the miRNAs target mRNAs and differential expressed log2FC. [file peerj-08-9656-s008.xlsx]

## Sheet: S Table 8
S Table – 8: The common target of the prognostic signature miRNAs and differential expressed mRNAs (set 2)
© 2000-2020 QIAGEN. All rights reserved.
Expr Fold Change	Symbol	Entrez Gene Name	Type(s)
1.095	ACTL6A	actin like 6A	other
1.675	ACVR1C	activin A receptor type 1C	kinase
1.772	ADA	adenosine deaminase	enzyme
1.674	ADAMTS15	ADAM metallopeptidase with thrombospondin type 1 motif 15	peptidase
-2.213	ADAMTS8	ADAM metallopeptidase with thrombospondin type 1 motif 8	peptidase
1.307	ADRB3	adrenoceptor beta 3	G-protein coupled receptor
1.277	AGBL2	ATP/GTP binding protein like 2	enzyme
1.024	AHR	aryl hydrocarbon receptor	ligand-dependent nuclear receptor
-1.831	ANXA1	annexin A1	enzyme
1.053	APCDD1	APC down-regulated 1	other
-1.181	AQP2	aquaporin 2	transporter
-4.79	AQP5	aquaporin 5	transporter
-1.51	AR	androgen receptor	ligand-dependent nuclear receptor
-1.773	ARHGEF38	Rho guanine nucleotide exchange factor 38	other
1.086	ARID3A	AT-rich interaction domain 3A	transcription regulator
1.11	ARL14	ADP ribosylation factor like GTPase 14	other
2.98	ASPN	asporin	other
-1.182	ASXL3	ASXL transcriptional regulator 3	other
1.928	AURKB	aurora kinase B	kinase
1.14	BAK1	BCL2 antagonist/killer 1	other
1.06	BICC1	BicC family RNA binding protein 1	other
1.206	BMF	Bcl2 modifying factor	other
2.09	C11orf87	chromosome 11 open reading frame 87	other
3.211	C1QTNF6	C1q and TNF related 6	other
-1.015	C2orf73	chromosome 2 open reading frame 73	other
-1.607	C2orf88	chromosome 2 open reading frame 88	other
1.961	C6orf141	chromosome 6 open reading frame 141	other
-2.05	C9orf135	chromosome 9 open reading frame 135	other
-2.194	CACNB4	calcium voltage-gated channel auxiliary subunit beta 4	ion channel
1.159	CAV2	caveolin 2	other
-1.472	CCL23	C-C motif chemokine ligand 23	cytokine
1.003	CCL3	C-C motif chemokine ligand 3	cytokine
1.767	CCL7	C-C motif chemokine ligand 7	cytokine
1.712	CCNF	cyclin F	other
1.317	CCR7	C-C motif chemokine receptor 7	G-protein coupled receptor
2.737	CCR8	C-C motif chemokine receptor 8	G-protein coupled receptor
-1.299	CD200R1	CD200 receptor 1	transmembrane receptor
2.242	CD276	CD276 molecule	other
1.036	CDC7	cell division cycle 7	kinase
1.407	CDK6	cyclin dependent kinase 6	kinase
1.663	CHST1	carbohydrate sulfotransferase 1	enzyme
-1.399	CLDN23	claudin 23	other
1.86	CLEC1B	C-type lectin domain family 1 member B	transmembrane receptor
-1.201	CNR1	cannabinoid receptor 1	G-protein coupled receptor
5.169	COL11A1	collagen type XI alpha 1 chain	other
1.193	COL15A1	collagen type XV alpha 1 chain	other
4.531	COL1A1	collagen type I alpha 1 chain	other
3.559	COL1A2	collagen type I alpha 2 chain	other
-1.366	COL21A1	collagen type XXI alpha 1 chain	other
2.767	COL22A1	collagen type XXII alpha 1 chain	other
2.059	COL27A1	collagen type XXVII alpha 1 chain	other
2.996	COL2A1	collagen type II alpha 1 chain	other
3.859	COL3A1	collagen type III alpha 1 chain	other
3.536	COL4A1	collagen type IV alpha 1 chain	other
3.146	COL4A2	collagen type IV alpha 2 chain	other
2.716	COL4A5	collagen type IV alpha 5 chain	other
4.009	COL5A1	collagen type V alpha 1 chain	other
3.995	COL5A2	collagen type V alpha 2 chain	other
2.473	COL5A3	collagen type V alpha 3 chain	other
3.463	COL6A3	collagen type VI alpha 3 chain	other
2.784	COL7A1	collagen type VII alpha 1 chain	other
2.651	COL8A1	collagen type VIII alpha 1 chain	other
-1.515	CPEB3	cytoplasmic polyadenylation element binding protein 3	translation regulator
-1.067	CPEB4	cytoplasmic polyadenylation element binding protein 4	other
3.799	CTHRC1	collagen triple helix repeat containing 1	other
1.859	CTSK	cathepsin K	peptidase
3.613	CXCL11	C-X-C motif chemokine ligand 11	cytokine
1.074	CYP19A1	cytochrome P450 family 19 subfamily A member 1	enzyme
2.095	DCBLD1	discoidin, CUB and LCCL domain containing 1	other
-1.374	DDAH1	dimethylarginine dimethylaminohydrolase 1	enzyme
1.829	DEPDC1	DEP domain containing 1	transcription regulator
-1.522	DLGAP2	DLG associated protein 2	other
2.633	DNMT3B	DNA methyltransferase 3 beta	enzyme
1.009	DOCK5	dedicator of cytokinesis 5	other
-1.435	DUSP1	dual specificity phosphatase 1	phosphatase
-1.563	EFCAB6	EF-hand calcium binding domain 6	other
-1.746	ELF3	E74 like ETS transcription factor 3	transcription regulator
1.457	ELFN1	extracellular leucine rich repeat and fibronectin type III domain containing 1	other
-1.171	ELN	elastin	other
-1.058	ELOVL4	ELOVL fatty acid elongase 4	enzyme
-1.041	ENHO	energy homeostasis associated	other
-2.505	ENPP5	ectonucleotide pyrophosphatase/phosphodiesterase family member 5	enzyme
1.407	ENTPD7	ectonucleoside triphosphate diphosphohydrolase 7	enzyme
1.77	EOMES	eomesodermin	transcription regulator
2.309	FADS2	fatty acid desaturase 2	enzyme
1.592	FBN1	fibrillin 1	other
-1.636	FHL1	four and a half LIM domains 1	other
-5.189	FMO2	flavin containing dimethylaniline monoxygenase 2	enzyme
2.04	FOXC2	forkhead box C2	transcription regulator
3.916	FOXL2	forkhead box L2	transcription regulator
2.276	FSCN1	fascin actin-bundling protein 1	other
1.017	FTL	ferritin light chain	enzyme
1.139	FZD6	frizzled class receptor 6	G-protein coupled receptor
-4.573	GABRP	gamma-aminobutyric acid type A receptor pi subunit	ion channel
-1.404	GAS7	growth arrest specific 7	transcription regulator
-2.017	GATM	glycine amidinotransferase	enzyme
3.222	GBP5	guanylate binding protein 5	enzyme
1.18	GDNF	glial cell derived neurotrophic factor	growth factor
-1.641	GPM6A	glycoprotein M6A	ion channel
1.482	GPR84	G protein-coupled receptor 84	G-protein coupled receptor
1.127	GPX7	glutathione peroxidase 7	enzyme
-1.267	GRIA1	glutamate ionotropic receptor AMPA type subunit 1	ion channel
-1.637	GUCY2C	guanylate cyclase 2C	kinase
3.768	HAPLN1	hyaluronan and proteoglycan link protein 1	other
1.701	HAS2	hyaluronan synthase 2	enzyme
1.474	HAS3	hyaluronan synthase 3	enzyme
1.304	HAVCR2	hepatitis A virus cellular receptor 2	other
3.228	HMGA2	high mobility group AT-hook 2	enzyme
-1.638	HMGCLL1	3-hydroxymethyl-3-methylglutaryl-CoA lyase like 1	enzyme
2.555	HOXA1	homeobox A1	transcription regulator
1.379	HOXA5	homeobox A5	transcription regulator
2.135	HOXA7	homeobox A7	transcription regulator
1.337	HOXA9	homeobox A9	transcription regulator
-1.125	HOXB1	homeobox B1	transcription regulator
2.242	HOXB6	homeobox B6	transcription regulator
3.294	HOXB7	homeobox B7	transcription regulator
1.698	HOXB8	homeobox B8	transcription regulator
3.711	HOXC8	homeobox C8	transcription regulator
2.394	HOXD8	homeobox D8	transcription regulator
-2.672	HPGD	15-hydroxyprostaglandin dehydrogenase	enzyme
1.057	HSPA2	heat shock protein family A (Hsp70) member 2	other
1.708	HTR1B	5-hydroxytryptamine receptor 1B	G-protein coupled receptor
2.29	ICOS	inducible T cell costimulator	transmembrane receptor
1.755	IFI30	IFI30 lysosomal thiol reductase	enzyme
1.009	IGF1R	insulin like growth factor 1 receptor	transmembrane receptor
3.543	IL24	interleukin 24	cytokine
1.182	IRS1	insulin receptor substrate 1	enzyme
1.313	ISLR	immunoglobulin superfamily containing leucine rich repeat	other
-3.211	KCNJ16	potassium inwardly rectifying channel subfamily J member 16	ion channel
1.722	KCNJ6	potassium inwardly rectifying channel subfamily J member 6	ion channel
1.079	KCTD17	potassium channel tetramerization domain containing 17	other
2.008	KIF3C	kinesin family member 3C	other
-3.302	KLF15	Kruppel like factor 15	transcription regulator
-1.241	KLF4	Kruppel like factor 4	transcription regulator
2.316	KREMEN2	kringle containing transmembrane protein 2	other
-1.809	KRT19	keratin 19	other
1.328	KRT5	keratin 5	other
-2.494	KRT7	keratin 7	other
1.608	LAMC1	laminin subunit gamma 1	other
1.022	LASP1	LIM and SH3 protein 1	transporter
-2.018	LDOC1	LDOC1 regulator of NFKB signaling	other
1.311	LHFPL2	LHFPL tetraspan subfamily member 2	enzyme
3.908	LHX5	LIM homeobox 5	transcription regulator
3.452	LHX9	LIM homeobox 9	transcription regulator
1.393	LIMD2	LIM domain containing 2	other
3.635	LOXL2	lysyl oxidase like 2	enzyme
2.691	LUM	lumican	other
1.174	MCM7	minichromosome maintenance complex component 7	enzyme
1.076	MEX3B	mex-3 RNA binding family member B	kinase
-1.145	MITF	melanocyte inducing transcription factor	transcription regulator
1.738	MSN	moesin	other
1.352	MYBL1	MYB proto-oncogene like 1	transcription regulator
2.494	MYBL2	MYB proto-oncogene like 2	transcription regulator
-3.119	MYRIP	myosin VIIA and Rab interacting protein	other
-1.889	NAALADL2	N-acetylated alpha-linked acidic dipeptidase like 2	other
1.314	NAGS	N-acetylglutamate synthase	enzyme
1.44	NAT14	N-acetyltransferase 14 (putative)	other
1.381	NAV1	neuron navigator 1	enzyme
1.297	NAV3	neuron navigator 3	other
1.135	NCS1	neuronal calcium sensor 1	other
1.283	NDRG1	N-myc downstream regulated 1	kinase
4.092	NELL2	neural EGFL like 2	other
1.512	NGF	nerve growth factor	growth factor
1.136	NMI	N-myc and STAT interactor	transcription regulator
-1.003	NOSTRIN	nitric oxide synthase trafficking	transcription regulator
-1.534	NOVA1	NOVA alternative splicing regulator 1	other
1.336	NOVA2	NOVA alternative splicing regulator 2	other
1.886	NRIP3	nuclear receptor interacting protein 3	other
-1.206	NYNRIN	NYN domain and retroviral integrase containing	other
3.391	ONECUT2	one cut homeobox 2	transcription regulator
1.29	OSCAR	osteoclast associated Ig-like receptor	other
1.442	OSR2	odd-skipped related transciption factor 2	transcription regulator
-2.721	OXGR1	oxoglutarate receptor 1	G-protein coupled receptor
1.4	P4HA2	prolyl 4-hydroxylase subunit alpha 2	transporter
2.78	PAX5	paired box 5	transcription regulator
-1.703	PBX1	PBX homeobox 1	transcription regulator
2.175	PDCD1LG2	programmed cell death 1 ligand 2	enzyme
1.091	PFN2	profilin 2	enzyme
2.121	PI15	peptidase inhibitor 15	other
3.347	PLA2G2F	phospholipase A2 group IIF	enzyme
-1.322	PLAGL1	PLAG1 like zinc finger 1	transcription regulator
-1.707	PLN	phospholamban	transporter
1.532	PTGS2	prostaglandin-endoperoxide synthase 2	enzyme
3.725	PTHLH	parathyroid hormone like hormone	other
1.109	PTPRK	protein tyrosine phosphatase receptor type K	phosphatase
1.233	PTPRZ1	protein tyrosine phosphatase receptor type Z1	phosphatase
2.816	PXDN	peroxidasin	enzyme
1.392	RAB32	RAB32, member RAS oncogene family	enzyme
-1.255	RARB	retinoic acid receptor beta	ligand-dependent nuclear receptor
2.455	RDH16	retinol dehydrogenase 16	enzyme
-2.36	RNF183	ring finger protein 183	enzyme
1.549	RRM2	ribonucleotide reductase regulatory subunit M2	enzyme
1.302	RXFP1	relaxin family peptide receptor 1	G-protein coupled receptor
2.888	SALL4	spalt like transcription factor 4	transcription regulator
-2.104	SAMD5	sterile alpha motif domain containing 5	other
1.1	SCG2	secretogranin II	cytokine
1.914	SCN8A	sodium voltage-gated channel alpha subunit 8	ion channel
-2.513	SCRG1	stimulator of chondrogenesis 1	other
1.445	SGPP1	sphingosine-1-phosphate phosphatase 1	phosphatase
1.607	SIGLEC14	sialic acid binding Ig like lectin 14	other
1.2	SKIL	SKI like proto-oncogene	transcription regulator
-1.561	SLAIN1	SLAIN motif family member 1	other
-1.604	SLC16A9	solute carrier family 16 member 9	other
-2.144	SLC1A1	solute carrier family 1 member 1	transporter
1.555	SLC1A4	solute carrier family 1 member 4	transporter
2.409	SLC24A2	solute carrier family 24 member 2	transporter
1.304	SLC30A3	solute carrier family 30 member 3	transporter
1.05	SLC36A1	solute carrier family 36 member 1	transporter
-2.81	SLC5A8	solute carrier family 5 member 8	transporter
-1.579	SLC5A9	solute carrier family 5 member 9	transporter
-2.152	SLC6A1	solute carrier family 6 member 1	transporter
-2.585	SLC9A2	solute carrier family 9 member A2	transporter
1.079	SMOX	spermine oxidase	enzyme
1.019	SMS	spermine synthase	enzyme
-1.833	SMTNL2	smoothelin like 2	other
2.129	SOCS1	suppressor of cytokine signaling 1	other
1.395	SOX12	SRY-box transcription factor 12	transcription regulator
-1.78	SPAG17	sperm associated antigen 17	other
2.602	SPARC	secreted protein acidic and cysteine rich	other
1.629	SSX4/SSX4B	SSX family member 4	other
1.517	STARD4	StAR related lipid transfer domain containing 4	transporter
1.112	STK17A	serine/threonine kinase 17a	kinase
-1.532	SYPL2	synaptophysin like 2	other
1.463	SYT1	synaptotagmin 1	transporter
-1.898	TAC1	tachykinin precursor 1	other
1.459	TCL1A	T cell leukemia/lymphoma 1A	transcription regulator
1.497	TGFB3	transforming growth factor beta 3	growth factor
1.079	TGFBR1	transforming growth factor beta receptor 1	kinase
-1.64	TGFBR3	transforming growth factor beta receptor 3	kinase
-2.628	THRSP	thyroid hormone responsive	other
1.567	TLL1	tolloid like 1	peptidase
1.417	TMC7	transmembrane channel like 7	other
1.129	TMEM114	transmembrane protein 114	other
1.263	TMEM200B	transmembrane protein 200B	other
1.019	TNFAIP3	TNF alpha induced protein 3	enzyme
2.429	TNFRSF9	TNF receptor superfamily member 9	transmembrane receptor
1.049	TNFSF10	TNF superfamily member 10	cytokine
1.028	TNFSF9	TNF superfamily member 9	cytokine
-3.1	TOX3	TOX high mobility group box family member 3	transcription regulator
1.949	TRAM2	translocation associated membrane protein 2	other
1.207	TREML1	triggering receptor expressed on myeloid cells like 1	other
1.317	TRIM9	tripartite motif containing 9	enzyme
1.283	TRPC3	transient receptor potential cation channel subfamily C member 3	ion channel
-1.391	TSPAN12	tetraspanin 12	other
1.164	TSPAN18	tetraspanin 18	other
1.053	TTPAL	alpha tocopherol transfer protein like	other
2.274	TTYH3	tweety family member 3	ion channel
1.346	TWIST1	twist family bHLH transcription factor 1	transcription regulator
1.253	TYMS	thymidylate synthetase	enzyme
2.042	UHRF1	ubiquitin like with PHD and ring finger domains 1	transcription regulator
1.426	ULBP1	UL16 binding protein 1	transmembrane receptor
1.155	ULBP2	UL16 binding protein 2	transmembrane receptor
-1.705	UNC13C	unc-13 homolog C	other
-1.414	UTY	ubiquitously transcribed tetratricopeptide repeat containing, Y-linked	enzyme
-1.248	VGLL1	vestigial like family member 1	transcription regulator
2.136	XAF1	XIAP associated factor 1	other
-1.921	ZBTB16	zinc finger and BTB domain containing 16	transcription regulator
1.074	ZNF367	zinc finger protein 367	transcription regulator
-1.055	ZNF385D	zinc finger protein 385D	other
