# Supplementary material for: Predictive models for stage and risk classification in head and neck squamous cell carcinoma (HNSCC)
Source: PeerJ. 2020 Sep 22;8:e9656. doi: 10.7717/peerj.9656 (PMC7518185; doi:10.7717/peerj.9656)
Supplement: Table S9 — The pathway analysis was performed using Ingenuity pathway analysis. The pathway enrichment was assessed by their enrichment −log10 p-value. [file peerj-08-9656-s009.xlsx]

## Sheet: S Table 9
S Table – 9: List of enriched pathways for diagnostic miRNA (set 1)
© 2000-2020 QIAGEN. All rights reserved.
Ingenuity Canonical Pathways	-log(p-value)	Ratio	Molecules
GP6 Signaling Pathway	15.3	0.164	COL11A1,COL15A1,COL1A1,COL1A2,COL21A1,COL22A1,COL27A1,COL2A1,COL3A1,COL4A1,COL4A2,COL4A5,COL5A1,COL5A2,COL5A3,COL6A3,COL7A1,COL8A1,LAMC1
Hepatic Fibrosis / Hepatic Stellate Cell Activation	14.8	0.121	CCR7,COL11A1,COL15A1,COL1A1,COL1A2,COL21A1,COL22A1,COL27A1,COL2A1,COL3A1,COL4A1,COL4A2,COL4A5,COL5A1,COL5A2,COL5A3,COL6A3,COL7A1,COL8A1,IGF1R,TGFB3,TGFBR1
Apelin Liver Signaling Pathway	6.14	0.231	COL1A1,COL1A2,COL2A1,COL3A1,COL5A3,IRS1
Neuroinflammation Signaling Pathway	4.65	0.0481	ACVR1C,CCL3,CD200R1,GABRP,GDNF,GRIA1,KCNJ6,NGF,PLA2G2F,PTGS2,SLC6A1,TGFB3,TGFBR1,TGFBR3
Intrinsic Prothrombin Activation Pathway	3.79	0.122	COL1A1,COL1A2,COL2A1,COL3A1,COL5A3
Hepatic Fibrosis Signaling Pathway	3.13	0.036	ACVR1C,CCL3,CNR1,COL1A1,COL1A2,COL2A1,COL3A1,COL5A3,FTL,FZD6,TGFB3,TGFBR1,TGFBR3
Glucocorticoid Receptor Signaling	2.93	0.036	ANXA1,AR,CCL3,DUSP1,HSPA2,KRT19,KRT5,KRT7,PBX1,PTGS2,TGFB3,TGFBR1
Th1 and Th2 Activation Pathway	2.87	0.0479	ACVR1C,CCR8,HAVCR2,ICOS,IL24,SOCS1,TGFBR1,TGFBR3
Wnt/β-catenin Signaling	2.82	0.0471	ACVR1C,FZD6,KREMEN2,RARB,SOX12,TGFB3,TGFBR1,TGFBR3
FAT10 Cancer Signaling Pathway	2.57	0.087	ACVR1C,TGFB3,TGFBR1,TGFBR3
Atherosclerosis Signaling	2.31	0.0488	COL1A1,COL1A2,COL2A1,COL3A1,COL5A3,PLA2G2F
Transcriptional Regulatory Network in Embryonic Stem Cells	2.31	0.0741	EOMES,HOXB1,LHX5,SKIL
Pathogenesis of Multiple Sclerosis	2.27	0.222	CCL3,CXCL11
Factors Promoting Cardiogenesis in Vertebrates	2.24	0.0556	ACVR1C,FZD6,TGFB3,TGFBR1,TGFBR3
Dendritic Cell Maturation	2.18	0.0405	CCR7,COL1A1,COL1A2,COL2A1,COL3A1,COL5A3,FSCN1
Th2 Pathway	2.15	0.0451	ACVR1C,CCR8,ICOS,IL24,TGFBR1,TGFBR3
HOTAIR Regulatory Pathway	2.04	0.0385	AR,COL1A1,COL1A2,DNMT3B,MEX3B,TWIST1
Granulocyte Adhesion and Diapedesis	1.72	0.0364	CCL23,CCL3,CCL7,CLDN23,CXCL11,MSN
Role of Oct4 in Mammalian Embryonic Stem Cell Pluripotency	1.71	0.0667	CCNF,HOXB1,SALL4
T Cell Exhaustion Signaling Pathway	1.68	0.0355	ACVR1C,EOMES,HAVCR2,PDCD1LG2,TGFBR1,TGFBR3
Endocannabinoid Neuronal Synapse Pathway	1.64	0.0394	CACNB4,CNR1,GRIA1,KCNJ6,PTGS2
Agranulocyte Adhesion and Diapedesis	1.6	0.0341	CCL23,CCL3,CCL7,CLDN23,CXCL11,MSN
Spermine Biosynthesis	1.6	0.5	SMS
Glycine Degradation (Creatine Biosynthesis)	1.6	0.5	GATM
Human Embryonic Stem Cell Pluripotency	1.58	0.0379	FZD6,NGF,SALL4,TGFB3,TGFBR1
Aryl Hydrocarbon Receptor Signaling	1.51	0.0365	AHR,CDK6,MCM7,RARB,TGFB3
Pyrimidine Deoxyribonucleotides De Novo Biosynthesis I	1.5	0.0909	RRM2,TYMS
Cell Cycle Control of Chromosomal Replication	1.47	0.0536	CDC7,CDK6,MCM7
Glutamate Receptor Signaling	1.47	0.0536	GRIA1,SLC1A1,SLC1A4
Regulation of the Epithelial-Mesenchymal Transition Pathway	1.56	0.0314	FOXC2,FZD6,HMGA2,TGFB3,TGFBR1,TWIST1
PCP pathway	1.39	0.05	CTHRC1,FZD6,PFN2
Antiproliferative Role of TOB in T Cell Signaling	1.37	0.0769	TGFB3,TGFBR1
Melatonin Degradation II	1.3	0.25	SMOX
Senescence Pathway	1.23	0.0257	ACVR1C,ASXL3,CDK6,ELF3,TGFB3,TGFBR1,TGFBR3
Growth Hormone Signaling	1.21	0.0423	IGF1R,IRS1,SOCS1
Small Cell Lung Cancer Signaling	1.21	0.0423	CDK6,PTGS2,RARB
dTMP De Novo Biosynthesis	1.21	0.2	TYMS
4-1BB Signaling in T Lymphocytes	1.21	0.0625	TNFRSF9,TNFSF9
Role of JAK2 in Hormone-like Cytokine Signaling	1.21	0.0625	IRS1,SOCS1
p38 MAPK Signaling	1.2	0.0339	DUSP1,PLA2G2F,TGFB3,TGFBR1
IL-7 Signaling Pathway	1.18	0.0411	BAK1,PAX5,SOCS1
MIF-mediated Glucocorticoid Regulation	1.16	0.0588	PLA2G2F,PTGS2
Adenine and Adenosine Salvage III	1.13	0.167	ADA
Purine Ribonucleosides Degradation to Ribose-1-phosphate	1.13	0.167	ADA
NF-κB Signaling	1.13	0.0284	IGF1R,NGF,TGFBR1,TGFBR3,TNFAIP3
Interferon Signaling	1.12	0.0556	BAK1,SOCS1
PPARα/RXRα Activation	1.12	0.0281	ACVR1C,IRS1,TGFB3,TGFBR1,TGFBR3
STAT3 Pathway	1.03	0.0296	IGF1R,SOCS1,TGFBR1,TGFBR3
RAR Activation	1.02	0.0262	DUSP1,RARB,RDH16,TGFB3,ZBTB16
Sphingosine and Sphingosine-1-phosphate Metabolism	1.01	0.125	SGPP1
Superoxide Radicals Degradation	1.01	0.125	GPX7
