# Supplementary material for: Predictive models for stage and risk classification in head and neck squamous cell carcinoma (HNSCC)
Source: PeerJ. 2020 Sep 22;8:e9656. doi: 10.7717/peerj.9656 (PMC7518185; doi:10.7717/peerj.9656)
Supplement: Table S10 — The miRNA targets mRNAs were also enriched with the Kyoto Encyclopedia of Genes and Genomes (KEGG). The enriched pathways as evaluated based on their respective p-value. [file peerj-08-9656-s010.xlsx]

## Sheet: S Table 10
S Table - 10: Pathways enrichment analysis of set 2 genes in KEGG (p-value <0.05)
Term	P-value	Adjusted P-value	Odds Ratio	Combined Score	Genes
Arachidonic acid metabolism	8.51826e-05	0.0262363	8.28157	77.6042	PLA2G2F;GGT5;GPX3;PLA2G2A;CYP2C19;PTGS2
Cytokine-cytokine receptor interaction	0.00016178	0.0249141	3.54925	30.9823	EDAR;CXCL11;ACVR1C;CCL7;TNFSF10;CCL3;TNFSF9;CCL2;CCR7;NGF;TGFBR1;TNFSF13B
Small cell lung cancer	0.000718026	0.0737174	5.6101	40.6115	CDK6;COL4A2;RARB;PTGS2;FHIT;CKS1B
Transcriptional misregulation in cancer	0.00143421	0.110434	3.74007	24.4867	HOXA9;ZBTB16;HMGA2;UTY;CDK14;MET;PBX1;IGF1R
ECM-receptor interaction	0.00256136	0.15778	5.30223	31.6395	COL1A2;COL4A2;ITGB4;TNC;AGRN
alpha-Linolenic acid metabolism	0.00286395	0.147016	10.4348	61.1014	PLA2G2F;FADS2;PLA2G2A
Glutathione metabolism	0.00391981	0.172472	6.21118	34.4206	GGT5;RRM2;GPX3;PGD
Linoleic acid metabolism	0.00439892	0.169358	8.9955	48.8132	PLA2G2F;PLA2G2A;CYP2C19
Signaling pathways regulating pluripotency of stem cells	0.00547529	0.187376	3.75352	19.5465	ACVR1C;ONECUT1;HOXB1;SKIL;JAK3;IGF1R
Non-small cell lung cancer	0.007037	0.21674	5.27009	26.1216	CDK6;RARB;JAK3;FHIT
MicroRNAs in cancer	0.00796335	0.222974	2.61742	12.6497	SOCS1;CDK6;TNC;IGF2BP1;PDCD4;HMGA2;BRCA1;PTGS2;MET
PI3K-Akt signaling pathway	0.00810518	0.208033	2.4564	11.8282	COL1A2;CDK6;COL4A2;ITGB4;TNC;BRCA1;NGF;JAK3;MET;IGF1R
Adherens junction	0.00952446	0.225657	4.83092	22.4826	SNAI2;MET;TGFBR1;IGF1R
Serotonergic synapse	0.00990717	0.217958	3.84763	17.7549	GABRB2;KCNJ6;DUSP1;CYP2C19;PTGS2
Arginine and proline metabolism	0.018757	0.385144	5.32387	21.1687	GATM;SMOX;P4HA2
Ovarian steroidogenesis	0.018757	0.361073	5.32387	21.1687	PTGS2;CYP19A1;IGF1R
Rheumatoid arthritis	0.0209248	0.379109	3.82226	14.78	CCL3;CCL2;TNFSF13B;ATP6V1B1
Chemokine signaling pathway	0.0228334	0.390705	2.746	10.3786	CXCL11;CCL7;CCL3;CCL2;CCR7;JAK3
Cell adhesion molecules (CAMs)	0.0262699	0.42585	2.9985	10.9125	CNTNAP1;SELL;CLDN14;HLA-F;ICOS
Progesterone-mediated oocyte maturation	0.0274747	0.423111	3.51339	12.6289	PLK1;CPEB3;IGF1R;CPEB4
Focal adhesion	0.0278268	0.408127	2.6218	9.39066	COL1A2;COL4A2;ITGB4;TNC;MET;IGF1R
AGE-RAGE signaling pathway in diabetic complications	0.02837	0.39718	3.47826	12.391	COL1A2;COL4A2;CCL2;TGFBR1
Human papillomavirus infection	0.0375923	0.50341	2.10804	6.91638	COL1A2;CDK6;COL4A2;ITGB4;TNC;HLA-F;PTGS2;ATP6V1B1
