# Supplementary material for: Predictive models for stage and risk classification in head and neck squamous cell carcinoma (HNSCC)
Source: PeerJ. 2020 Sep 22;8:e9656. doi: 10.7717/peerj.9656 (PMC7518185; doi:10.7717/peerj.9656)
Supplement: Table S11 — The pathway analysis was performed using WikiPathways data set. WikiPathways contains the experimental biological data from different sources. The significant pathway is evaluated based on the p-value. The top enriched pathways are Nuclear Receptors Meta-Pathway, TGF-beta pathways, and PIK3-Akt signaling pathway. [file peerj-08-9656-s011.xlsx]

## Sheet: S Table 11
S Table 11 : Pathways enrichment against WikiPathways of set 1 genes (p-value <0.05)
Term	P-value	Adjusted P-value	Odds Ratio	Combined Score	Genes
Nuclear Receptors Meta-Pathway WP2882	8.79801e-05	0.0415266	3.54368	33.0923	GPX3;PTGS2;PGD;CYP2C19;SLC6A2;TGFBR3;EPB41L4B;SLC5A9;PDK4;SNAI2;CCL2;TNS4;CPEB4
Hepatitis C and Hepatocellular Carcinoma WP3646	0.000243158	0.0573853	8.87311	73.8403	RRM2;COL4A2;BRCA1;PTGS2;TGFBR1
TGF-beta Signaling Pathway WP366	0.000847915	0.0800432	4.61133	32.6147	TGFBR3;COL1A2;ITGB4;TNC;SKIL;MET;TGFBR1
Metapathway biotransformation Phase I and II WP702	0.00129332	0.101741	3.80138	25.2812	CHST11;SULT1E1;GPX3;CYP4B1;FMO2;CYP2C19;CYP19A1;NAT14
Hypothesized Pathways in Pathogenesis of Cardiovascular Disease WP3668	0.00286395	0.193112	10.4348	61.1014	TGFBR3;TGFBR1;FBN1
Extracellular vesicle-mediated signaling in recipient cells WP2870	0.00484667	0.285953	8.69565	46.3432	TGFBR3;MET;TGFBR1
Ectoderm Differentiation WP2858	0.00528847	0.277351	3.78072	19.8194	ZBTB16;CCL2;POU2F2;PDE7A;SKIL;LY6E
PI3K-Akt Signaling Pathway WP4172	0.00617963	0.291679	2.55754	13.0089	COL1A2;CDK6;COL4A2;ITGB4;TNC;BRCA1;NGF;JAK3;MET;IGF1R
Non-small cell lung cancer WP4255	0.007037	0.301951	5.27009	26.1216	CDK6;RARB;JAK3;FHIT
Focal Adhesion-PI3K-Akt-mTOR-signaling pathway WP3932	0.00864593	0.340073	2.58287	12.2703	PFKFB1;COL1A2;COL4A2;ITGB4;TNC;NGF;JAK3;MET;IGF1R
Signaling Pathways in Glioblastoma WP2261	0.0148229	0.538184	4.24178	17.8646	CDK6;BRCA1;MET;IGF1R
Regulation of Microtubule Cytoskeleton WP2038	0.0158459	0.534233	5.67108	23.5057	TPPP;PHLDB2;AURKB
Canonical and Non-Canonical TGF-B signaling WP3874	0.0159838	0.502957	10.2302	42.3139	TGFBR1;LOXL1
TGF-B Signaling in Thyroid Cells for Epithelial-Mesenchymal Transition WP3859	0.017847	0.526487	9.66184	38.8978	TNC;SNAI2
Retinoblastoma Gene in Cancer WP2446	0.0180509	0.501178	3.998	16.0502	TOP2A;RRM2;CDK6;TYMS
Endoderm Differentiation WP2853	0.0236376	0.619831	3.08356	11.5477	DDAH1;ZNF281;ONECUT1;HOXA1;PBX1
Tamoxifen metabolism WP691	0.0239503	0.594976	8.28157	30.905	SULT1E1;CYP2C19
TGF-beta Receptor Signaling WP560	0.0242235	0.571676	4.83092	17.9731	TGFBR3;SKIL;TGFBR1
miRNA targets in ECM and membrane receptors WP2911	0.0261487	0.587723	7.90514	28.806	COL1A2;COL4A2
Focal Adhesion WP306	0.0272393	0.584406	2.63505	9.49432	COL1A2;COL4A2;ITGB4;TNC;MET;IGF1R
Mesodermal Commitment Pathway WP2857	0.0276535	0.567499	2.9577	10.6122	DDAH1;ZNF281;HMGA2;RARB;PBX1
Glutathione metabolism WP100	0.0284254	0.559033	7.56144	26.9223	GGT5;GPX3
The human immune response to tuberculosis WP4197	0.0284254	0.536672	7.56144	26.9223	SOCS1;IFIT3
Integrated Breast Cancer Pathway WP1984	0.0305578	0.554741	2.87936	10.0436	EDAR;PLK1;BRCA1;CYP19A1;TGFBR1
Oxidation by Cytochrome P450 WP43	0.0331666	0.579801	4.27655	14.5668	CYP4B1;CYP2C19;CYP19A1
TYROBP Causal Network WP3945	0.0331666	0.559094	4.27655	14.5668	RBM47;SAMSN1;TGFBR1
Wnt/beta-catenin Signaling Pathway in Leukemia WP3658	0.0357055	0.581138	6.68896	22.2906	SALL4;ZBTB16
Lung fibrosis WP3624	0.0359957	0.566332	4.14079	13.7654	CCL3;CCL2;SKIL
Eicosanoid Synthesis WP167	0.0382754	0.582774	6.44122	21.0174	PLA2G2A;PTGS2
Chemokine signaling pathway WP3929	0.0412873	0.608987	2.65111	8.44963	CXCL11;CCL7;CCL3;CCR7;JAK3
Selective expression of chemokine receptors during T-cell polarization WP4494	0.0436186	0.623878	5.997	18.7842	CCL3;CCR7
Factors and pathways affecting insulin-like growth factor (IGF1)-Akt signaling WP3850	0.0492202	0.683292	5.6101	16.8945	TNFSF9;IGF1R
