# Supplementary material for: Predictive models for stage and risk classification in head and neck squamous cell carcinoma (HNSCC)
Source: PeerJ. 2020 Sep 22;8:e9656. doi: 10.7717/peerj.9656 (PMC7518185; doi:10.7717/peerj.9656)
Supplement: Table S12 — IPA has multiple tools for enrichment factor analysis such as disease and network. The disease enrichment analysis showed revealed cancer, Cell cycle and cell movement have a higher score (42,35,35 respectively). [file peerj-08-9656-s012.xlsx]

## Sheet: S Table 12
S Table – 12: IPA disease enrichment analysis for set 1 genes.
© 2000-2020 QIAGEN. All rights reserved.
ID	Molecules in Network	Score	Molecules	Top Diseases and Functions
1	26s Proteasome,ACTL6A,ADA,AURKB,CCNF,CDC7,CDK6, COL1A1,COL1A2, COL6A3, Cyclin E, E2f ,EOMES,FBN1, HAPLN1 ,Histone h3,Histone h4,HOXA5,HOXA9, HOXB1,HOXB6,KLF4, KRT19, LOXL2, MCM7,MITF,MYBL2,NMI,P38 MAPK,RARB,Rb,SALL4,Smad2/3,TGFBR1,TYMS	42	27	[Cancer, Cell Cycle]
2	Alp,AQP2,AQP5,ASPN,BCR (complex),Calcineurin protein(s), CCL3,CCL7,CCR7,CCR8, COL2A1, Collagen type II,CTSK,DNA-methyltransferase, ELF3,ELN,Fcer1 ,FOXL2, GAS7, ICOS, IL12 (complex),IL24,NFkB (complex), Nr1h,OSCAR,OSR2,Pka,PTHLH, RRM2,TAC1,TGFB3,TNFRSF9, TNFSF9, ULBP1,Vegf	35	24	[Cellular Movement, Immune Cell Trafficking]
3	Akt,BMF,CD276,CG,CLDN23,COL4A2,COL4A5,COL7A1,CXCL11,DNMT3B,ERK,estrogen receptor, FOXC2,GDNF,HMGA2, HOXA1,Hsp27, IGF1R,Igm, Immunoglobulin, IRS1, KLF15, LASP1,Mek,P4HA2,PAX5,PDGF BB,PI3K (family) ,Raf,SPARC, STK17A,TCL1A, TGFBR3,TNFAIP3,UHRF1	35	24	[Cellular Development, Cellular Growth and Proliferation, Cellular Movement]
4	ACVR1C,ADRB3,AHR,ANXA1,Ap1,BAK1,CNR1,COL3A1,Cpla2,Creb,CYP19A1,DUSP1,ERK1/2,Filamin,Focal adhesion kinase,FSCN1,HAS2, HAS3,HOXB7,HPGD, Integrin, LDL, LUM,MAP2K1/2,NAALADL2,Nfat (family),NGF,PI3K (complex),Pkc(s), PTGS2, PTPRK,PTPRZ1,SKIL,TNFSF10,ULBP2	33	23	[Cell Death and Survival, Cellular Development, Cellular Movement]
5	ADCY,AGBL2,BAK1,BMP4,CCR7,CYP19A1,DEPDC1,DKK1,FOXO1,FTL,GABRP,GADD45A,ITGB6,KRT7,LAMC1,LEFTY2,LHX5,mir-145,miR-34a-5p (and other miRNAs w/seed GGCAGUG),NCAPG,NEK2,NOTCH2,NYNRIN,POU5F1,PRC1,RLN2,RXFP1,SHC1,SIRT6,SOX4,TMC7,TNFRSF9,TP53,TRAM2,VGLL1	19	16	[Cancer, Cellular Development, Organismal Injury and Abnormalities]
6	ARID3A,ATF4,BCL2A1,C1QTNF6,CASP3,CEBPA,COL27A1,CTHRC1,CTNNA1,CTNNB1,DVL1,ESR1,FBN1,FZD6,GATM,GPR84,HOXA7,KDM4B,KRT5,MBD1,MYOC,NCOA3,NDRG1,PLAGL1,PRTN3,PTHLH,PXDN,SBDS,SFRP2,SIAH2,SLC1A4,SLC7A11,TGFBR2,WNT16,ZNF367	19	16	[Connective Tissue Development and Function]
7	Actin,AR,caspase,CAV2,CD200R1,CD3,COL15A1,DCTPP1,DEGS1,EFCAB6,FSH,GBP5,GNRHR,GPRC5B,Growth hormone,HAVCR2,Hsp90,IFN Beta,IgG,Interferon alpha,Jnk,Lh,MSN,ONECUT2,PARP,PCMT1,PFN2,RNA polymerase II,SOCS1,SPRY1,TCR,TRIM9,TWIST1,XAF1,ZBTB16	18	15	[Cancer, Gastrointestinal Disease, Organismal Injury and Abnormalities]
8	ABCG1,APP,AZGP1,C6orf141,CCL23,CCR1,CLEC1B,COL8A1,CSF2,DCLK1,DLGAP2,ELOVL4,ENTPD7,FADS2,FMO2,GP6,GPM6A,HSPH1,IFI30,MGP,mir-145,MYC,NFYA,NOSTRIN,NRIP3,REST,SCG2,SMARCA4,SNCA,ST3GAL1,SYK,TAL1,TNFSF4,TSPAN12,USP37	18	15	[Cancer, Gastrointestinal Disease, Organismal Injury and Abnormalities]
9	AIFM1,APOE,BAG1,BCL2L1,BCL6,CPEB4,CST5,CXCR2,DIABLO,DOCK5,DPP4,GADD45A,GRIA1,IL24,ITPR3,LIMD2,MALT1,MBD1,NAMPT,NAV3,NELL2,NR1I3,NR3C1,PDCD1LG2,RNF183,SGPP1,SH3KBP1,SLC6A1,SLC9A2,SOX4,THRSP,TNFRSF10A,TNFRSF11B,TNFSF11,TNFSF9	16	14	[Cancer, Gastrointestinal Disease, Organismal Injury and Abnormalities]
10	ATP2A2,BCL2,CHST1,CXCR3,GUCY2C,HAMP,HMGCLL1,HOXB8,HOXC8,INS,ITPR3,KIF3C,LMAN2,LPL,mir-148,mir-34,NAMPT,NGF,NOTCH2,Pde3,PIK3CB,PLN,RAB32,RDH16,RPS6KA3,RRM2,SLC30A3,SLC5A8,SOX4,STAT,STIM1,TIFA,TNF,TNFSF14,TRPC3	16	14	[Cancer, Gastrointestinal Disease, Organismal Injury and Abnormalities]
11	ADRB2,CDCA3,COL11A1,COL21A1,DDAH1,DHCR24,ENPP5,FHL1,FZD8,HNRNPA2B1,HSPA2,IGFBP2,KCNJ3,KCNJ6,KDM5B,LHFPL2,NOVA1,NUPR1,PBX1,RASSF8,SLC1A1,SMOX,SYT1,TMPO,TOX3,ZNF100,ZNF254,ZNF429,ZNF43,ZNF431,ZNF528,ZNF665,ZNF708,ZNF85,ZNF91	16	14	[Cancer, Gastrointestinal Disease, Organismal Injury and Abnormalities]
12	ACSL5,BRD4,CCND1,CDK6,COL4A1,COL5A1,COL5A2,COL5A3,EIF3E,GATA3,HEXIM1,HOXD8,IGFBP5,JARID2,LGALS3,LOXL1,miR-29b-3p (and other miRNAs w/seed AGCACCA),MRTFB,MUC1,MYBL1,MYRIP,NAV1,NORAD,RPS6KB1,SAMD5,SLC16A9,SLC36A1,Smad2/3,SPDEF,STARD4,TEAD1,TEAD2,TEAD3,TEAD4,WWTR1	14	13	[Cancer, Gastrointestinal Disease, Organismal Injury and Abnormalities]
