# Supplementary material for: Predictive models for stage and risk classification in head and neck squamous cell carcinoma (HNSCC)
Source: PeerJ. 2020 Sep 22;8:e9656. doi: 10.7717/peerj.9656 (PMC7518185; doi:10.7717/peerj.9656)
Supplement: Table S13 — The pathway analysis showed that top enriched pathways are Neuroinflammation Signaling (−log10 p-value = 5.23), Cell Cycle: G2/M DNA Damage Checkpoint Regulation (−log10 p-value = 2.65), Bupropion Degradation (−log10 p-value = 2.62). The complete list attached. [file peerj-08-9656-s013.xlsx]

## Sheet: S Table 13
S Table – 13: List of enriched pathways of the different miRNAs targets mRNAs of prognostic signature (set 2)
© 2000-2020 QIAGEN. All rights reserved.
Ingenuity Canonical Pathways	-log(p-value)	Ratio	Molecules
Neuroinflammation Signaling Pathway	5.23	0.0481	ACVR1C,CCL2,CCL3,CD200R1,GABRB2,HLA-F,JAK3,KCNJ6,NGF,PLA2G2A,PLA2G2F,PTGS2,TGFBR1,TGFBR3
Oct4 in Mammalian Embryonic Stem Cell Pluripotency	3.84	0.111	BRCA1,CCNF,HOXB1,IGF2BP1,SALL4
Hepatic Fibrosis / Hepatic Stellate Cell Activation	2.96	0.044	CCL2,CCR7,COL1A2,COL27A1,COL4A2,IGF1R,MET,TGFBR1
Small Cell Lung Cancer Signaling	2.91	0.0704	CDK6,CKS1B,FHIT,PTGS2,RARB
MAPK Signaling in the Pathogenesis of Influenza	2.73	0.0641	CCL2,PLA2G2A,PLA2G2F,PTGS2,RASD2
Cell Cycle: G2/M DNA Damage Checkpoint Regulation	2.65	0.0816	BRCA1,CKS1B,PLK1,TOP2A
Bupropion Degradation	2.62	0.125	CYP19A1,CYP2C19,CYP4B1
Nicotine Degradation II	2.5	0.0741	CYP19A1,CYP2C19,CYP4B1,FMO2
Cell Cycle Control of Chromosomal Replication	2.44	0.0714	CDK14,CDK6,POLA2,TOP2A
NF-κB Signaling	2.41	0.0398	IGF1R,NGF,NTRK3,RASD2,TGFBR1,TGFBR3,TNFSF13B
Superpathway of Melatonin Degradation	2.41	0.0702	CYP19A1,CYP2C19,CYP4B1,SMOX
Acetone Degradation I (to Methylglyoxal)	2.38	0.103	CYP19A1,CYP2C19,CYP4B1
STAT3 Pathway	2.37	0.0444	IGF1R,NTRK3,RASD2,SOCS1,TGFBR1,TGFBR3
Pathogenesis of Multiple Sclerosis	2.37	0.222	CCL3,CXCL11
Glucocorticoid Receptor Signaling	2.34	0.03	CCL2,CCL3,DUSP1,JAK3,KRT19,PBX1,POU2F2,PTGS2,RASD2,TGFBR1
MIF-mediated Glucocorticoid Regulation	2.19	0.0882	PLA2G2A,PLA2G2F,PTGS2
Epithelial Adherens Junction Signaling	2.15	0.04	ACVR1C,MET,RASD2,SNAI2,TGFBR1,TGFBR3
Non-Small Cell Lung Cancer Signaling	2.03	0.0548	CDK6,FHIT,RARB,RASD2
Estrogen Biosynthesis	2.02	0.0769	CYP19A1,CYP2C19,CYP4B1
Sperm Motility	1.97	0.0329	AXL,IGF1R,JAK3,MET,NTRK3,PLA2G2A,PLA2G2F
Macropinocytosis Signaling	1.97	0.0526	ITGB4,MET,NGF,RASD2
IL-15 Production	1.97	0.0424	AXL,IGF1R,JAK3,MET,NTRK3
Granulocyte Adhesion and Diapedesis	1.95	0.0364	CCL2,CCL3,CCL7,CLDN14,CXCL11,SELL
MIF Regulation of Innate Immunity	1.93	0.0714	PLA2G2A,PLA2G2F,PTGS2
Th1 and Th2 Activation Pathway	1.93	0.0359	ACVR1C,ICOS,JAK3,SOCS1,TGFBR1,TGFBR3
T Cell Exhaustion Signaling Pathway	1.91	0.0355	ACVR1C,HLA-F,JAK3,RASD2,TGFBR1,TGFBR3
IL-17 Signaling	1.9	0.05	CCL2,CXCL11,PTGS2,RASD2
Wnt/β-catenin Signaling	1.9	0.0353	ACVR1C,GJA1,RARB,SFRP4,TGFBR1,TGFBR3
PTEN Signaling	1.85	0.0397	IGF1R,NTRK3,RASD2,TGFBR1,TGFBR3
Agranulocyte Adhesion and Diapedesis	1.83	0.0341	CCL2,CCL3,CCL7,CLDN14,CXCL11,SELL
FAT10 Cancer Signaling Pathway	1.82	0.0652	ACVR1C,TGFBR1,TGFBR3
Communication between Innate and Adaptive Immune Cells	1.77	0.046	CCL3,CCR7,HLA-F,TNFSF13B
Nicotine Degradation III	1.77	0.0625	CYP19A1,CYP2C19,CYP4B1
Human Embryonic Stem Cell Pluripotency	1.77	0.0379	NGF,NTRK3,SALL4,SPHK1,TGFBR1
Differential Regulation of Cytokine Production in Macrophages and T Helper Cells by IL-17A and IL-17F	1.77	0.111	CCL2,CCL3
Th2 Pathway	1.76	0.0376	ACVR1C,ICOS,JAK3,TGFBR1,TGFBR3
Thyroid Cancer Signaling	1.73	0.06	NGF,NTRK3,RASD2
Melatonin Degradation I	1.68	0.0577	CYP19A1,CYP2C19,CYP4B1
Regulation of the Epithelial-Mesenchymal Transition Pathway	1.67	0.0314	HMGA2,JAK3,MET,RASD2,SNAI2,TGFBR1
Hepatic Fibrosis Signaling Pathway	1.67	0.0249	ACVR1C,CCL2,CCL3,COL1A2,PDCD4,RASD2,TFRC,TGFBR1,TGFBR3
Glycine Degradation (Creatine Biosynthesis)	1.65	0.5	GATM
Role of IL-17A in Arthritis	1.64	0.0556	CCL2,CCL7,PTGS2
Transcriptional Regulatory Network in Embryonic Stem Cells	1.64	0.0556	HOXB1,ONECUT1,SKIL
Pyrimidine Deoxyribonucleotides De Novo Biosynthesis I	1.6	0.0909	RRM2,TYMS
Differential Regulation of Cytokine Production in Intestinal Epithelial Cells by IL-17A and IL-17F	1.56	0.087	CCL2,CCL3
IL-2 Signaling	1.5	0.0492	JAK3,RASD2,SOCS1
SPINK1 General Cancer Pathway	1.5	0.0492	JAK3,MT1F,RASD2
HMGB1 Signaling	1.49	0.0318	CCL2,RASD2,TNFSF10,TNFSF13B,TNFSF9
Virus Entry via Endocytic Pathways	1.48	0.0374	HLA-F,ITGB4,RASD2,TFRC
Eicosanoid Signaling	1.45	0.0469	PLA2G2A,PLA2G2F,PTGS2
Role of JAK1 and JAK3 in γc Cytokine Signaling	1.4	0.0448	JAK3,RASD2,SOCS1
Cardiac Hypertrophy Signaling (Enhanced)	1.36	0.021	ACVR1C,IGF1R,PDE7A,PTGS2,RASD2,TGFBR1,TGFBR3,TNFSF10,TNFSF13B,TNFSF9
Pentose Phosphate Pathway (Oxidative Branch)	1.35	0.25	PGD
Spermine and Spermidine Degradation I	1.35	0.25	SMOX
Melatonin Degradation II	1.35	0.25	SMOX
TREM1 Signaling	1.35	0.0429	CCL2,CCL3,CCL7
p38 MAPK Signaling	1.35	0.0339	DUSP1,PLA2G2A,PLA2G2F,TGFBR1
Noradrenaline and Adrenaline Degradation	1.35	0.0667	DHRS9,SMOX
Growth Hormone Signaling	1.34	0.0423	IGF1R,ONECUT1,SOCS1
Estrogen-Dependent Breast Cancer Signaling	1.31	0.0411	CYP19A1,IGF1R,RASD2
IL-7 Signaling Pathway	1.31	0.0411	JAK3,MET,SOCS1
Atherosclerosis Signaling	1.3	0.0325	CCL2,COL1A2,PLA2G2A,PLA2G2F
PPARα/RXRα Activation	1.29	0.0281	ACVR1C,CYP2C19,RASD2,TGFBR1,TGFBR3
Neurotrophin/TRK Signaling	1.27	0.0395	NGF,NTRK3,RASD2
Lysine Degradation V	1.26	0.2	PIPOX
dTMP De Novo Biosynthesis	1.26	0.2	TYMS
Chemokine Signaling	1.25	0.039	CCL2,CCL7,RASD2
IL-17A Signaling in Fibroblasts	1.23	0.0571	CCL2,CCL7
JAK/Stat Signaling	1.21	0.0375	JAK3,RASD2,SOCS1
Interferon Signaling	1.21	0.0556	IFIT3,SOCS1
IL-4 Signaling	1.19	0.0366	JAK3,RASD2,SOCS1
HER-2 Signaling in Breast Cancer	1.16	0.0357	CDK6,ITGB4,RASD2
VEGF Family Ligand-Receptor Interactions	1.16	0.0357	PLA2G2A,PLA2G2F,RASD2
Ovarian Cancer Signaling	1.15	0.029	BRCA1,GJA1,PTGS2,RASD2
PDGF Signaling	1.14	0.0349	JAK3,RASD2,SPHK1
Phagosome Maturation	1.12	0.0284	ATP6V1B1,CTSC,HLA-F,SNAP25
Role of Hypercytokinemia/hyperchemokinemia in the Pathogenesis of Influenza	1.11	0.0488	CCL2,CCL3
Role of IL-17F in Allergic Inflammatory Airway Diseases	1.11	0.0488	CCL2,CCL7
Crosstalk between Dendritic Cells and Natural Killer Cells	1.1	0.0337	CCR7,HLA-F,TNFSF10
Dermatan Sulfate Biosynthesis (Late Stages)	1.09	0.0476	CHST11,SULT1E1
Factors Promoting Cardiogenesis in Vertebrates	1.09	0.0333	ACVR1C,TGFBR1,TGFBR3
Xenobiotic Metabolism Signaling	1.07	0.0223	CHST11,CYP2C19,FMO2,RASD2,SMOX,SULT1E1
Oncostatin M Signaling	1.07	0.0465	JAK3,RASD2
Senescence Pathway	1.06	0.0221	ACVR1C,CDK6,PDK4,RASD2,TGFBR1,TGFBR3
Primary Immunodeficiency Signaling	1.06	0.0455	ICOS,JAK3
Chondroitin Sulfate Biosynthesis (Late Stages)	1.06	0.0455	CHST11,SULT1E1
LPS/IL-1 Mediated Inhibition of RXR Function	1.05	0.0238	CHST11,CYP2C19,FMO2,SMOX,SULT1E1
TGF-β Signaling	1.03	0.0312	ACVR1C,RASD2,TGFBR1
HOTAIR Regulatory Pathway	1	0.0256	COL1A2,MET,MEX3B,SNAI2
