# Supplementary material for: Predictive models for stage and risk classification in head and neck squamous cell carcinoma (HNSCC)
Source: PeerJ. 2020 Sep 22;8:e9656. doi: 10.7717/peerj.9656 (PMC7518185; doi:10.7717/peerj.9656)
Supplement: Table S14 — The KEGG (Kyoto Encyclopedia of Genes and Genomes) is a systematic knowledge-based database repository of genes. Genes were systematically enriched into KEGG and found most of the pathways are associated with cancer progression such as ECM-receptor interaction signaling, small cell lung cancer, transcriptional misregulation in cancer has the highest significant p-value. [file peerj-08-9656-s014.xlsx]

## Sheet: S Table 14
S Table -14 : Pathways enrichment analysis of set 2 genes in KEGG (p-value <0.05)
Term	P-value	Adjusted P-value	Odds Ratio	Combined Score	Genes
ECM-receptor interaction	1.10656e-05	0.0017041	7.53367	85.9717	COL1A1;COL2A1;COL1A2;COL4A2;COL4A1;COL4A5;COL6A3;LAMC1
Small cell lung cancer	2.79764e-05	0.00287225	6.64259	69.6419	CDK6;COL4A2;COL4A1;RARB;COL4A5;LAMC1;BAK1;PTGS2
Transcriptional misregulation in cancer	0.000162134	0.00713388	4.15162	36.2315	HOXA9;HPGD;ZBTB16;HMGA2;MITF;UTY;PAX5;BAK1;PBX1;IGF1R
Focal adhesion	0.000279815	0.0107729	3.88041	31.7471	COL1A1;COL1A2;COL2A1;COL4A2;COL4A1;CAV2;COL4A5;COL6A3;LAMC1;IGF1R
Relaxin signaling pathway	0.000295981	0.0101291	4.752	38.6111	COL1A1;COL3A1;COL1A2;COL4A2;COL4A1;COL4A5;RXFP1;TGFBR1
PI3K-Akt signaling pathway	0.000756973	0.0233148	2.83577	20.3783	IRS1;LAMC1;NGF;IGF1R;COL1A1;TCL1A;COL1A2;COL2A1;CDK6;COL4A2;COL4A1;COL4A5;COL6A3
Human papillomavirus infection	0.00130301	0.0364844	2.808	18.6538	COL1A1;COL1A2;COL2A1;CDK6;COL4A2;COL4A1;FZD6;COL4A5;COL6A3;LAMC1;BAK1;PTGS2
Signaling pathways regulating pluripotency of stem cells	0.00225612	0.057907	3.88878	23.6987	ACVR1C;FZD6;LHX5;HOXB1;KLF4;SKIL;IGF1R
Arginine and proline metabolism	0.00368602	0.0873303	6.30368	35.3208	GATM;SMOX;P4HA2;SMS
Pathways in cancer	0.00398961	0.0877715	2.18547	12.0727	TGFB3;ZBTB16;FZD6;MITF;LAMC1;PTGS2;TGFBR1;IGF1R;AR;CDK6;COL4A2;COL4A1;RARB;COL4A5;BAK1
Hepatocellular carcinoma	0.00637902	0.130982	3.2175	16.2636	CDK6;TGFB3;FZD6;ACTL6A;BAK1;TGFBR1;IGF1R
Melanoma	0.0142162	0.273662	4.29	18.247	CDK6;MITF;BAK1;IGF1R
Proteoglycans in cancer	0.0160315	0.290452	2.68926	11.1152	CAV2;LUM;FZD6;TWIST1;COL21A1;MSN;IGF1R
Pancreatic cancer	0.0163015	0.278936	4.1184	16.9534	CDK6;TGFB3;BAK1;TGFBR1
MicroRNAs in cancer	0.0163156	0.264484	2.32435	9.56618	SOCS1;CDK6;IRS1;FSCN1;DNMT3B;HMGA2;BMF;BAK1;PTGS2
Chronic myeloid leukemia	0.0170368	0.262367	4.06421	16.551	CDK6;TGFB3;BAK1;TGFBR1
Synaptic vesicle cycle	0.018569	0.272346	3.96	15.7856	UNC13C;SYT1;SLC1A1;SLC6A1
Osteoclast differentiation	0.0248947	0.348526	3.04016	11.2276	SOCS1;CTSK;MITF;TGFBR1;OSCAR
Ovarian steroidogenesis	0.0255392	0.342003	4.72776	17.3393	PTGS2;CYP19A1;IGF1R
FoxO signaling pathway	0.0287786	0.369325	2.925	10.3783	IRS1;TGFB3;TNFSF10;TGFBR1;IGF1R
Measles	0.03392	0.417895	2.79783	9.46715	CDK6;MSN;TNFAIP3;HSPA2;BAK1
Regulation of lipolysis in adipocytes	0.0343836	0.407314	4.212	14.1952	ADRB3;IRS1;PTGS2
Glutathione metabolism	0.0359928	0.410584	4.13679	13.7525	RRM2;SMS;GPX7
Chemokine signaling pathway	0.037608	0.413688	2.43853	7.99969	CXCL11;CCL23;CCL7;CCL3;CCR8;CCR7
alpha-Linolenic acid metabolism	0.041215	0.437732	6.17761	19.7001	PLA2G2F;FADS2
Retrograde endocannabinoid signaling	0.043686	0.448509	2.60879	8.1674	GRIA1;GABRP;KCNJ6;CNR1;PTGS2
Gastric cancer	0.0447461	0.444575	2.59128	8.05045	TGFB3;FZD6;RARB;BAK1;TGFBR1
Biosynthesis of unsaturated fatty acids	0.0474194	0.456411	5.72001	17.4387	FADS2;ELOVL4
Arachidonic acid metabolism	0.048314	0.450931	3.67715	11.1419	PLA2G2F;GPX7;PTGS2
Non-small cell lung cancer	0.0541478	0.490515	3.51	10.2353	CDK6;RARB;BAK1
